# Supplementary material for: Understanding the Formation and Mechanism of Anticipatory Responses in Escherichia coli
Source: MDPI journal article supplement (doi:10.3390/ijms23115985), 2022-05-26
Supplement: s1 [file s1]

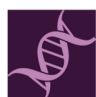

Article

# Understanding the Formation and Mechanism of Anticipatory Responses in *Escherichia coli*

Navneet Rai <sup>1,2</sup>, Minseung Kim <sup>1,2</sup> and Ilias Tagkopoulos <sup>1,2,3,\*</sup>

<sup>1</sup> UC Davis Genome Center, University of California-Davis, Davis, CA 95616, USA; nnrai@ucdavis.edu (N.R.); minseven77@gmail.com (M.K.)

<sup>2</sup> Department of Computer Science, University of California-Davis, Davis, CA 95616, USA

<sup>3</sup> USDA/NSF AI Institute for Next Generation Food Systems (AIFS), University of California, Davis, CA, 95616, USA

\*Correspondence: itagkopoulos@ucdavis.edu

## Supplementary information

1. Materials and methods.
2. Table 1. Primers used for qRT-PCR.
3. Table 2: List of primers used to integrate *gfp:kanR* cassette.
4. Table 3: List of primers used to repair the mutations.
5. Figure 1. Analysis of maximum growth rates of *E. coli* MG1655 in different carbon sources.
6. Figure 2. RT-PCR measurements of the fold change in the expression of selected target genes in *E. coli* MG1555 grown in M9 salt medium containing different carbon sources.
7. Figure 3. Characterization of MG1655 (*malP:gfp:kan*) strain. (A) Repression of the expression of *malP* in 10 mM Galactose. (B) Activation of the expression of *malP* in 10 mM Maltose.

## Materials and methods

### Transcriptome analysis of RNA-Seq experiments

A total of 43,931,731 single-end 50bp reads for 3 replicates of 3 samples was produced from *Illumina HiSeq* instrument. The fastq file produced from the machine was de-multiplexed into a separate file for each sample. Index sequences accompanying with reads were compared with pre-designed barcodes, allowing two base mismatches at most. Overall, samples had more than 4.3M raw reads. The low-quality of raw reads were trimmed using *Trimmomatic* (v0.30) with default settings. This procedure filtered out 4.8% of raw reads on average. The reads of the other samples were aligned on the most recent reference genome of *E. coli* MG1655 (NC\_000913.3) by using *TopHat* (v2.0.10) coupled with *bowtie2* (v2.1.0) [4,5]. The overall alignment rate was 94.3%.

## DEG (Differentially Expressed Gene) analysis

For identifying differentially expressed genes, three methods including *Cuffdiff*, *edgeR*, and *DESeq* were applied and the lists of genes with statistical significance were merged afterwards. For *Cuffdiff* analysis, we in general followed the guideline introduced in [6]. FPKM normalization coupled with upper-quantile normalization was first measured using *Cufflink*. Then the normalized gene expression levels were used for DEG analysis using *Cuffmerge* and *Cuffdiff* with the default settings. For *edgeR* and *DESeq* analysis [7,8], we first removed gene having excessive zero counts across samples. All the downstream analysis was performed as suggested in the corresponding manuals. All the p-values computed from the methods above were adjusted using FDR (False Discovery Rate) following Benjamin-Hochberg procedure. Confidence threshold ( $\alpha$ ) was set to 0.1. Finally, the differential genes are determined by finding genes statistically significant by all three methods.

## Figures

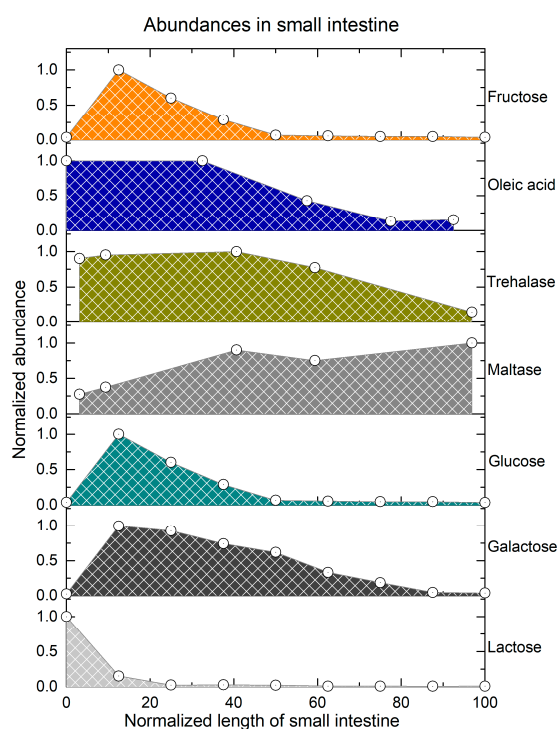

**Figure S1.** Abundances of different carbon sources in mammalian small intestine. Length of intestine is normalized from 0 to 100, while abundances of carbon sources are normalized from 0 to 1. Spatial concentration gradients of Maltase and Trehalase were used as proxies for the spatial concentration gradients of Maltose and Trehalose, respectively.

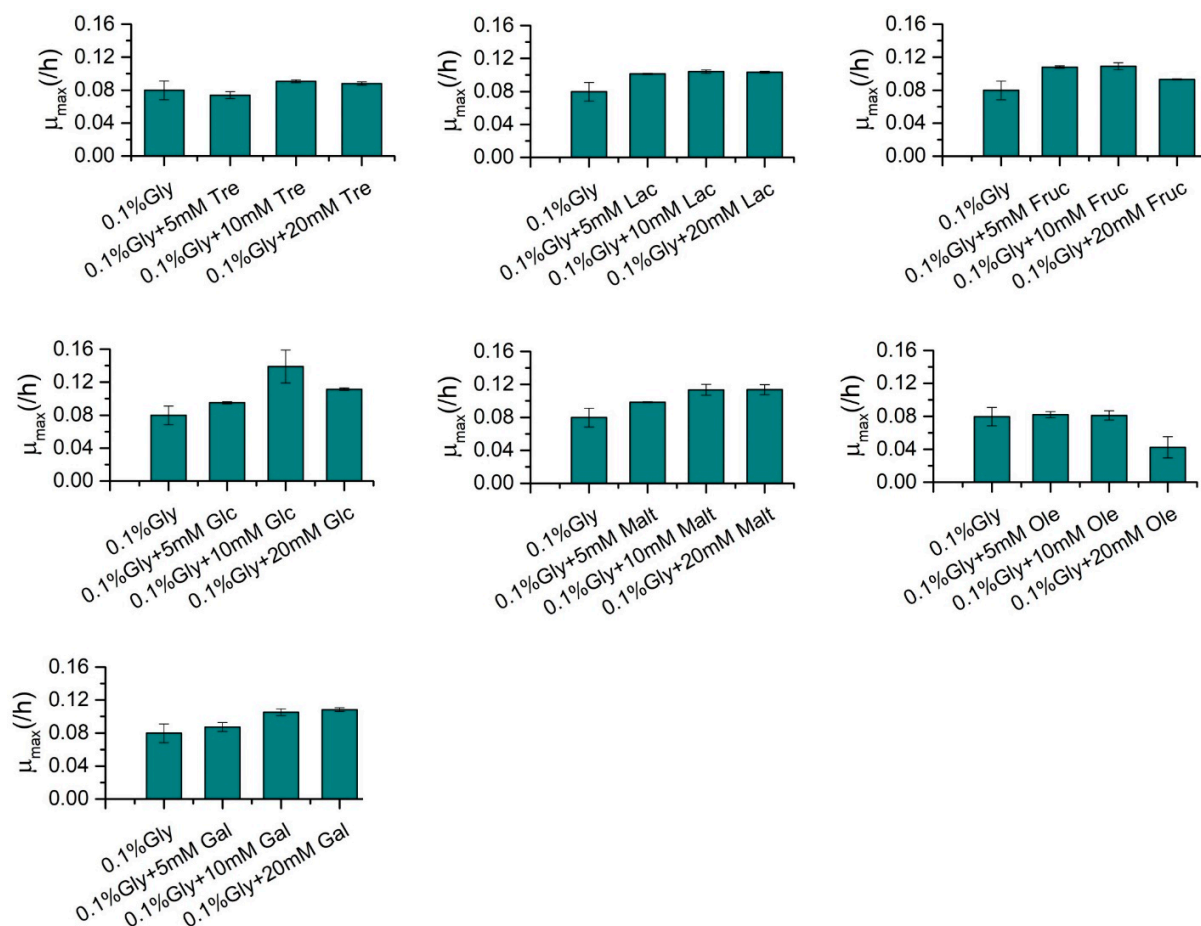

**Figure S2.** Analysis of maximum growth rates of *E. coli* MG1655 in different carbon sources. Gly; Glycerol, Tre; Trehalose, Lac; Lactose, Fruc; Fructose, Glc; Glucose, Malt; Maltose, Ole; Oleic acid, Gal; Galactose.

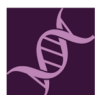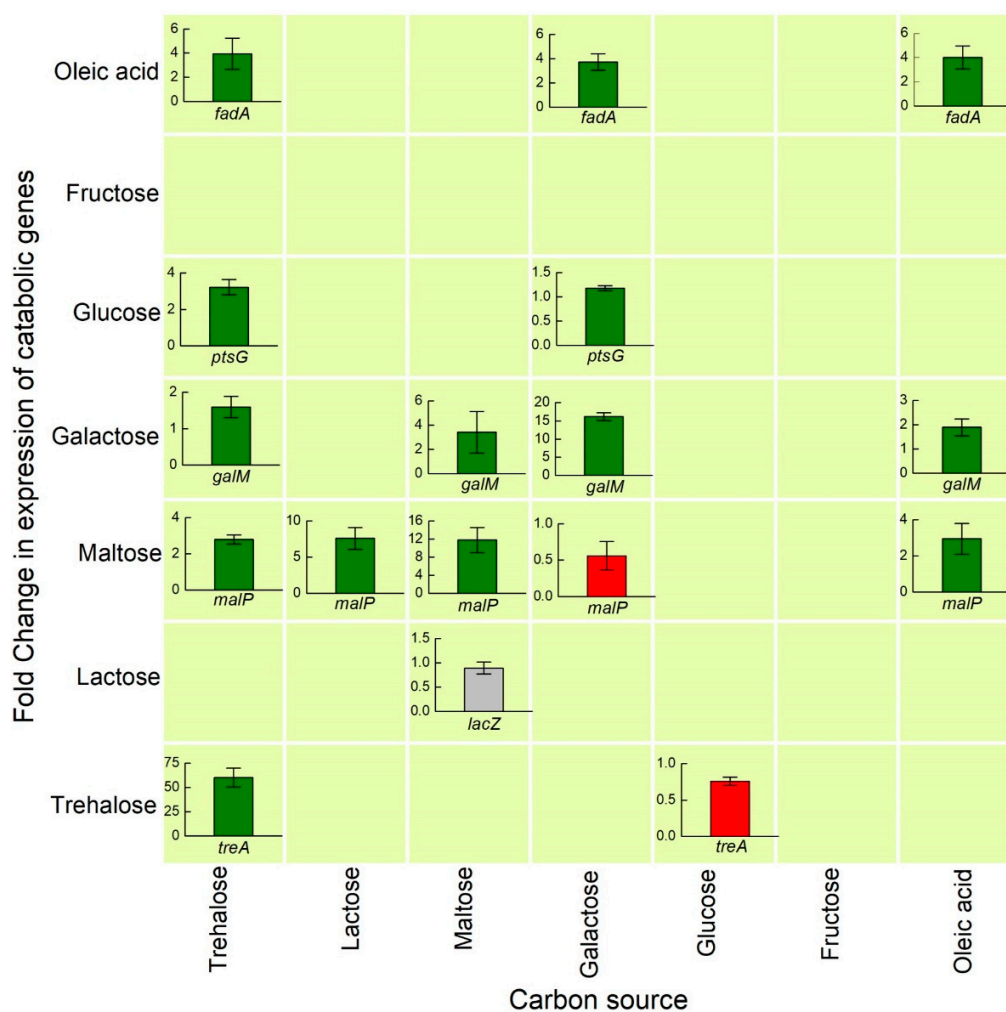

**Figure S3.** RT-PCR measurements of the fold change in the expression of selected target genes in *E. coli* MG1555 grown in M9 salt medium containing different carbon sources.

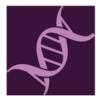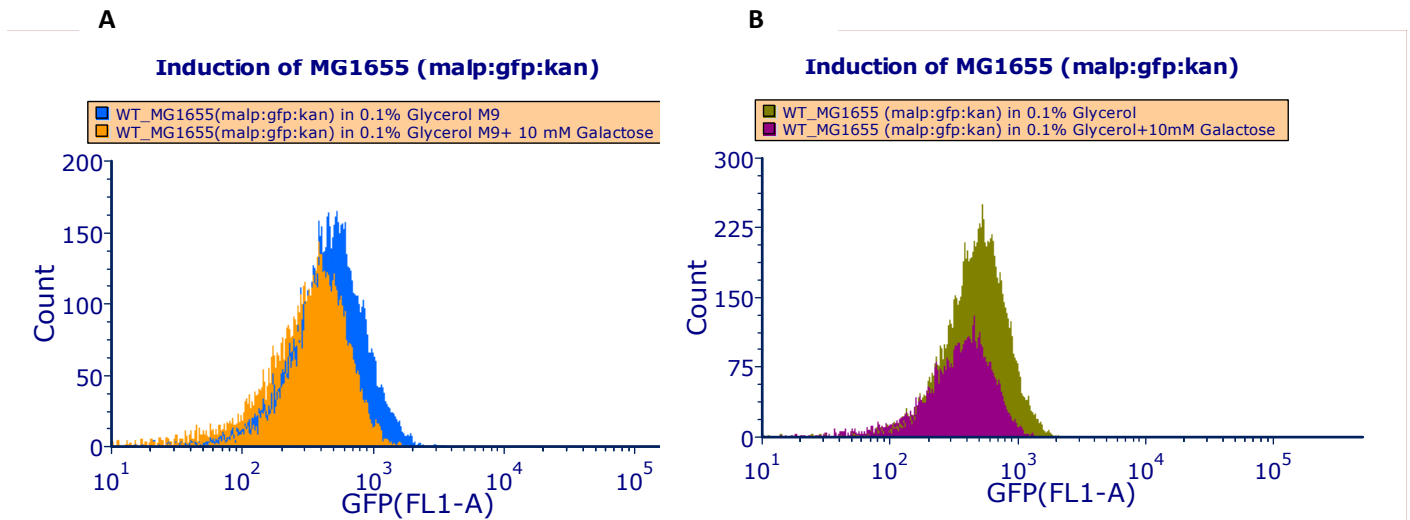

**Figure S4.** Characterization of MING (MG1655 with *malP:gfp:kan*) strain. (A) Repression of the expression of *malP* in 10 mM Galactose. (B) Activation of the expression of *malP* in 10 mM Maltose.

## Tables

**Table S1.** Primers used for qRT-PCR

| S. No. | Gene        | Primer  | Sequence (5→3)                |
|--------|-------------|---------|-------------------------------|
| 1      | <i>treB</i> | Forward | TTGATTAGCGGCGGTTTGATCCTCGG    |
|        |             | Reverse | TGACCAGCAAATACCGACCGGCAG      |
| 2      | <i>ptsG</i> | Forward | GTTCCGTCTTTGCAAACATGCCACTG    |
|        |             | Reverse | AGTACGCCAGTATCCGCCAGGTG       |
| 3      | <i>fadA</i> | Forward | AGAAGTACCACACTCTGTCCCGGC      |
|        |             | Reverse | CTTTGGCGACATTGCGGCTCAGG       |
| 4      | <i>galM</i> | Forward | TGGTCAGCCGTACCGACTGTTAACCTTG  |
|        |             | Reverse | TAACGACCAATAGAGGCCCCCAGAAACG  |
| 5      | <i>ihfB</i> | Forward | AATCGCACATTCCCGCCAAGACG       |
|        |             | Reverse | TCCAGTTCTACTTTATCGCCAGTCTTCGG |
| 6      | <i>lacZ</i> | Forward | TACCCAACCTTAATCGCCTTGACGACAC  |
|        |             | Reverse | CGGCCTCAGGAAGATCGCACTC        |
| 7      | <i>malP</i> | Forward | ATGACATCAATCTGACGGACCTGCTG    |
|        |             | Reverse | AGTCATCCGCGCTTCAACCTGTTTGC    |



**Table S2** List of primers used to integrate *gfp:kanR* cassette

| S. No. | Primer     | Sequence (5→3)                                                                                         |
|--------|------------|--------------------------------------------------------------------------------------------------------|
| 1      | Gfpkan_rv1 | TCCCGTTGAATATGGCTCATTCTAGATTTCTCCTCTTTAATCTCTAGTAT<br>TATTTGTATAGTTCATCCATGCCATGTGTAATCCCAG            |
| 2      | Gfp_in_fw  | AGCTCGGATCGCTCTATTTCGCGATTATCAGGCTCGTATCTGGCAGGCA<br>AAACGCTAATACTAGAGATTAAAGAGGAGAAATACTAGATGCGTAAAGG |
| 3      | Kan_in_fw  | TGGGGCTAATCCCCGCCGCCAGCGCGGCATTATCCAGACGTTTGCTTTC<br>CATCGAGCTTCCTTAGAAAACTCATCGAGCATCAAATGAAACTGC     |
| 4      | Kan_gfp_rv | CTGGGATTACACATGGCATGGATGAACTATACAAATAATACTAGAGAT<br>TAAAGAGGAGAAATCTAGAATGAGCCATATTCAACGGGAAACGTC      |

**Table S3.** List of primers used to repair the mutations

| S. No. | Primer    | Sequence (5→3)                                                                                              |
|--------|-----------|-------------------------------------------------------------------------------------------------------------|
| 1      | SP7.2_Fw  | GAGAAAGTGGGCAACCTGGCGTTCCTCGACGTGACGGAACAGGCTTA<br>CCCGTCTTACTGTCC                                          |
| 2      | SP7.4_Fw  | GTAACATCGTTAAAGGCTCTGTGGCAGTGCTGATCAAACACAGGCT<br>TACCGTCTTACTGTCC                                          |
| 3      | MT1S_Fw   | TTCAGACACATAAAAAAACGTCATCGCTTGCATTAGAAAGGTTTCTGG<br>CCTACAGGCTTACCGTCTTACTGTCC                              |
| 4      | SPU_Rv    | GGGGGAAACAAAATGGCGCGCTACCAGGTAACGCGCCACTCCGACGT<br>CGGTTCTGTAAGCTGTAATGCAAGTAGC                             |
| 5      | MT1S_Rv   | TTGAATGATGCAGAGATGTAAGCCGGATCTGGCGCGTTATCCGGCTAA<br>ACTCGGTTCTGTAAGCTGTAATGCAAGTAGC                         |
| 6      | Crp7.4_Fw | GTAACATCGTTAAAGGCTCTGTGGCAGTGCTGATCAAACACGAAGA<br>GGGTAAAGAAATGATCCTCTCTATCTG                               |
| 7      | Crp7.2_Fw | GAGAAAGTGGGCAACCTGGCGTTCCTCGACGTGACGGACCGCATTGC<br>ACAGACTCTGCTG                                            |
| 8      | Crpc_Rv   | CTTTAATCTCTAGATTTAACGAGTGCCGTAAACGACGATGGTTTTAC                                                             |
| 9      | Cm_Fw     | ACTCGTTAAATCTAGAGATTAAAGAGGAGAAATACTAGATGGAGAAA<br>AAAATCACGGGATATACCACCG                                   |
| 10     | Cm_Rv     | GGGGGAAACAAAATGGCGCGCTACCAGGTAACGCGCCACTCCGACGG<br>GATTACGCCCCGCCCTGCCACTC                                  |
| 11     | MalTP1_Fw | TTCAGACACATAAAAAAACGTCATCGCTTGCATTAGAAAGGTTTCTGG<br>CCTACCTTATAACCATTAATTACGAAGCGCAAAAAAATAATATTTCC<br>TCAT |
| 12     | MalT_Rvn  | TTAATCTCTAGATTTACACGCCGTACCCCATCATC                                                                         |
| 13     | MT1C_Rv   | TTGAATGATGCAGAGATGTAAGCCGGATCTGGCGCGTTATCCGGCTAA<br>ACTTACGCCCCGCCCTGCCACTC                                 |
