# Supplementary material for: Understanding the Formation and Mechanism of Anticipatory Responses in Escherichia coli
Source: Int J Mol Sci. 2022 May 26;23(11):5985. doi: 10.3390/ijms23115985 (PMC9181292; doi:10.3390/ijms23115985)
Supplement: Supplementary file 1 [file ijms-23-05985-s001.zip › Supplementary file 2.xlsx]

## Sheet: raw data
Lactose*		Galactose*		Glucose*		Maltase**			Trehalase**			Oleic acid***
Small intestine (Section)	residual sugar (g/l)	Small intestine (Section)	residual sugar (g/l)	Small intestine (Section)	residual sugar (g/l)	Region	Distance from pylorus (M)	activity (units/mg protein)	Region	Distance from pylorus (M)	activity (units/mg protein)	Region	Distance from top	Digestion, as a proportion of total digestion at the lower ileum
0	88.76	0	0.89	0	0.89	Duodenum	0.5	1.1	Duodenum	0.5	0.28	Duodenum	0 to 20	0.65
1	13.63	1	34.76	1	24.25	Jejunum	1.5	1.5	Jejunum	1.5	0.295	Upper jejunum	32.5	0.65		chicken intestine: 100 cm (absroption and secretion of fatty acids and bile acids in the intestine of laying fowl ( J. Nutr. 103: 543-547, 1973)
2	2.22	2	32.31	2	14.57	Jejunum	6.5	3.6	Jejunum	6.5	0.31	lower jejunum	57.5	0.28		duodenum: 0-20 cm, jejunum: 21-70 cm, ileum: 71-100 cm)
3	2.56	3	25.86	3	7	Ileum	9.5	3	Ileum	9.5	0.24	upper ileum	77.5	0.085
4	2	4	21.52	4	1.61	Ileum	15.5	4	Ileum	15.5	0.045	lower ileum	92.5	0.1
5	0.89	5	11.57	5	1.33
6	0.889	6	6.45	6	1.11
7	0.67	7	1.61	7	1.11
8	0.89	8	1.33	8	0.83
*https://doi.org/10.1079/BJN19730037							**DOI: 10.1152/ajpgi.1990.259.5.G822					***https://doi.org/10.3382/ps.2013-03344

## Sheet: normalized and scaled data
Normalized length of intestine	Normalized Glucose	Normalized Lactose	Normalized Galactose	NormalizedFructose	Normalized length of intestine	Normalized Maltase	Tnorm rehalase	Normalized length of intestine	Normalized Oleic acid
0	0.036701	1	0.0256041	0.036701	0	0.275	0.903226	0	1
0.001	0.0444701	0.993174	0.0334609	0.0444701	0.001	0.275	0.903226	0.001	1
0.002	0.0522392	0.986347	0.0413205	0.0522392	0.0021	0.275	0.903226	0.002	1
0.003	0.0600082	0.979521	0.0491772	0.0600082	0.0031	0.275	0.903226	0.003	1
0.004	0.0677732	0.972696	0.0570368	0.0677732	0.0042	0.275	0.903226	0.004	1
0.005	0.0755423	0.96587	0.0648936	0.0755423	0.0052	0.275	0.903226	0.005	1
0.006	0.0833113	0.959043	0.0727532	0.0833113	0.0063	0.275	0.903226	0.006	1
0.007	0.0910804	0.952217	0.0806099	0.0910804	0.0073	0.275	0.903226	0.007	1
0.008	0.0988495	0.945391	0.0884695	0.0988495	0.0083	0.275	0.903226	0.008	1
0.009	0.106619	0.938565	0.0963262	0.106619	0.0094	0.275	0.903226	0.009	1
0.01	0.114388	0.931738	0.104186	0.114388	0.0104	0.275	0.903226	0.0101	1
0.011	0.122157	0.924912	0.112043	0.122157	0.0115	0.275	0.903226	0.0111	1
0.012	0.129922	0.918087	0.119899	0.129922	0.0125	0.275	0.903226	0.0121	1
0.013	0.137691	0.911261	0.127759	0.137691	0.0135	0.275	0.903226	0.0131	1
0.014	0.14546	0.904434	0.135616	0.14546	0.0146	0.275	0.903226	0.0141	1
0.015	0.153229	0.897608	0.143475	0.153229	0.0156	0.275	0.903226	0.0151	1
0.016	0.160998	0.890782	0.151332	0.160998	0.0167	0.275	0.903226	0.0161	1
0.017	0.168767	0.883956	0.159192	0.168767	0.0177	0.275	0.903226	0.0171	1
0.018	0.176536	0.877129	0.167048	0.176536	0.0187	0.275	0.903226	0.0181	1
0.019	0.184305	0.870303	0.174908	0.184305	0.0198	0.275	0.903226	0.0191	1
0.02	0.19207	0.863478	0.182765	0.19207	0.0208	0.275	0.903226	0.0201	1
0.021	0.199839	0.856652	0.190621	0.199839	0.0219	0.275	0.903226	0.0211	1
0.022	0.207608	0.849825	0.198481	0.207608	0.0229	0.275	0.903226	0.0221	1
0.023	0.215377	0.842999	0.206338	0.215377	0.024	0.275	0.903226	0.0231	1
0.024	0.223146	0.836173	0.214197	0.223146	0.025	0.275	0.903226	0.0241	1
0.025	0.230915	0.829347	0.222054	0.230915	0.026	0.275	0.903226	0.0251	1
0.026	0.238685	0.82252	0.229914	0.238685	0.0271	0.275	0.903226	0.0261	1
0.027	0.246454	0.815694	0.23777	0.246454	0.0281	0.275	0.903226	0.0271	1
0.028	0.254219	0.808869	0.24563	0.254219	0.0292	0.275	0.903226	0.0281	1
0.029	0.261988	0.802043	0.253487	0.261988	0.0302	0.275	0.903226	0.0291	1
0.03	0.269757	0.795216	0.261346	0.269757	0.0313	0.275	0.903226	0.0302	1
0.031	0.277526	0.78839	0.269203	0.277526	0.0313	0.275	0.903226	0.0312	1
0.032	0.285295	0.781564	0.27706	0.285295	0.0323	0.276625	0.903871	0.0322	1
0.033	0.293064	0.774737	0.284919	0.293064	0.0333	0.278225	0.904839	0.0332	1
0.034	0.300833	0.767911	0.292776	0.300833	0.0343	0.27985	0.905484	0.0342	1
0.035	0.308598	0.761086	0.300636	0.308598	0.0353	0.28145	0.906452	0.0352	1
0.036	0.316367	0.75426	0.308493	0.316367	0.0363	0.283075	0.907097	0.0362	1
0.037	0.324136	0.747434	0.316352	0.324136	0.0373	0.284675	0.908065	0.0372	1
0.038	0.331905	0.740607	0.324209	0.331905	0.0383	0.2863	0.90871	0.0382	1
0.039	0.339674	0.733781	0.332068	0.339674	0.0393	0.2879	0.909355	0.0392	1
0.04	0.347443	0.726955	0.339925	0.347443	0.0403	0.289525	0.910323	0.0402	1
0.041	0.355212	0.720128	0.347785	0.355212	0.0413	0.291125	0.910968	0.0412	1
0.042	0.362981	0.713302	0.355642	0.362981	0.0423	0.29275	0.911935	0.0422	1
0.043	0.370746	0.706477	0.363498	0.370746	0.0433	0.29435	0.912581	0.0432	1
0.044	0.378515	0.699651	0.371358	0.378515	0.0444	0.295975	0.913226	0.0442	1
0.045	0.386285	0.692824	0.379215	0.386285	0.0454	0.297575	0.914194	0.0452	1
0.046	0.394054	0.685998	0.387074	0.394054	0.0464	0.2992	0.914839	0.0462	1
0.047	0.401823	0.679172	0.394931	0.401823	0.0474	0.3008	0.915806	0.0472	1
0.048	0.409592	0.672346	0.402791	0.409592	0.0484	0.302425	0.916452	0.0482	1
0.049	0.417361	0.665519	0.410647	0.417361	0.0494	0.304025	0.917419	0.0492	1
0.0501	0.42513	0.658693	0.418507	0.42513	0.0504	0.30565	0.918065	0.0503	1
0.0511	0.432895	0.651868	0.426364	0.432895	0.0514	0.30725	0.91871	0.0513	1
0.0521	0.440664	0.645042	0.43422	0.440664	0.0524	0.308875	0.919677	0.0523	1
0.0531	0.448433	0.638215	0.44208	0.448433	0.0534	0.310475	0.920323	0.0533	1
0.0541	0.456202	0.631389	0.449937	0.456202	0.0544	0.3121	0.92129	0.0543	1
0.0551	0.463971	0.624563	0.457796	0.463971	0.0554	0.3137	0.921935	0.0553	1
0.0561	0.47174	0.617737	0.465653	0.47174	0.0565	0.315325	0.922581	0.0563	1
0.0571	0.479509	0.61091	0.473513	0.479509	0.0575	0.316925	0.923548	0.0573	1
0.0581	0.487278	0.604084	0.481369	0.487278	0.0585	0.31855	0.924194	0.0583	1
0.0591	0.495043	0.597259	0.489229	0.495043	0.0595	0.32015	0.925161	0.0593	1
0.0601	0.502812	0.590433	0.497086	0.502812	0.0605	0.321775	0.925806	0.0603	1
0.0611	0.510581	0.583606	0.504945	0.510581	0.0615	0.323375	0.926774	0.0613	1
0.0621	0.518351	0.57678	0.512802	0.518351	0.0625	0.325	0.927419	0.0623	1
0.0631	0.52612	0.569954	0.520659	0.52612	0.0635	0.326625	0.928065	0.0633	1
0.0641	0.533889	0.563128	0.528518	0.533889	0.0645	0.328225	0.929032	0.0643	1
0.0651	0.541658	0.556301	0.536375	0.541658	0.0655	0.32985	0.929677	0.0653	1
0.0661	0.549423	0.549476	0.544235	0.549423	0.0665	0.33145	0.930645	0.0663	1
0.0671	0.557192	0.54265	0.552091	0.557192	0.0675	0.333075	0.93129	0.0673	1
0.0681	0.564961	0.535824	0.559951	0.564961	0.0685	0.334675	0.932258	0.0683	1
0.0691	0.57273	0.528997	0.567808	0.57273	0.0696	0.3363	0.932903	0.0693	1
0.0701	0.580499	0.522171	0.575667	0.580499	0.0706	0.3379	0.933548	0.0704	1
0.0711	0.588268	0.515345	0.583524	0.588268	0.0716	0.339525	0.934516	0.0714	1
0.0721	0.596037	0.508518	0.591384	0.596037	0.0726	0.341125	0.935161	0.0724	1
0.0731	0.603806	0.501692	0.599241	0.603806	0.0736	0.34275	0.936129	0.0734	1
0.0741	0.611571	0.494867	0.607097	0.611571	0.0746	0.34435	0.936774	0.0744	1
0.0751	0.61934	0.488041	0.614957	0.61934	0.0756	0.345975	0.937419	0.0754	1
0.0761	0.627109	0.481215	0.622814	0.627109	0.0766	0.347575	0.938387	0.0764	1
0.0771	0.634878	0.474388	0.630673	0.634878	0.0776	0.3492	0.939032	0.0774	1
0.0781	0.642647	0.467562	0.63853	0.642647	0.0786	0.3508	0.94	0.0784	1
0.0791	0.650416	0.460736	0.64639	0.650416	0.0796	0.352425	0.940645	0.0794	1
0.0801	0.658186	0.453909	0.654246	0.658186	0.0806	0.354025	0.941613	0.0804	1
0.0811	0.665955	0.447083	0.662106	0.665955	0.0817	0.35565	0.942258	0.0814	1
0.0821	0.67372	0.440258	0.669963	0.67372	0.0827	0.35725	0.942903	0.0824	1
0.0831	0.681489	0.433432	0.677819	0.681489	0.0837	0.358875	0.943871	0.0834	1
0.0841	0.689258	0.426605	0.685679	0.689258	0.0847	0.360475	0.944516	0.0844	1
0.0851	0.697027	0.419779	0.693536	0.697027	0.0857	0.3621	0.945484	0.0854	1
0.0861	0.704796	0.412953	0.701395	0.704796	0.0867	0.3637	0.946129	0.0864	1
0.0871	0.712565	0.406127	0.709252	0.712565	0.0877	0.365325	0.946774	0.0874	1
0.0881	0.720334	0.3993	0.717112	0.720334	0.0887	0.366925	0.947742	0.0884	1
0.0891	0.728103	0.392474	0.724968	0.728103	0.0897	0.36855	0.948387	0.0894	1
0.0901	0.735868	0.385649	0.732828	0.735868	0.0907	0.37015	0.949355	0.0905	1
0.0911	0.743637	0.378823	0.740685	0.743637	0.0917	0.371775	0.95	0.0915	1
0.0921	0.751406	0.371996	0.748544	0.751406	0.0927	0.373375	0.950968	0.0925	1
0.0931	0.759175	0.36517	0.756401	0.759175	0.0938	0.375	0.951613	0.0935	1
0.0941	0.766944	0.358344	0.764258	0.766944	0.0938	0.375	0.951613	0.0945	1
0.0951	0.774713	0.351518	0.772117	0.774713	0.0948	0.3767	0.951613	0.0955	1
0.0961	0.782482	0.344691	0.779974	0.782482	0.0958	0.378375	0.951935	0.0965	1
0.0971	0.790247	0.337866	0.787834	0.790247	0.0968	0.380075	0.951935	0.0975	1
0.0981	0.798016	0.33104	0.79569	0.798016	0.0978	0.38175	0.952258	0.0985	1
0.0991	0.805786	0.324214	0.80355	0.805786	0.0988	0.38345	0.952258	0.0995	1
0.1001	0.813555	0.317387	0.811407	0.813555	0.0998	0.385125	0.952581	0.1005	1
0.1011	0.821324	0.310561	0.819266	0.821324	0.1008	0.386825	0.952581	0.1015	1
0.1021	0.829093	0.303735	0.827123	0.829093	0.1018	0.3885	0.952903	0.1025	1
0.1031	0.836862	0.296909	0.834983	0.836862	0.1028	0.3902	0.952903	0.1035	1
0.1041	0.844631	0.290082	0.842839	0.844631	0.1038	0.391875	0.953226	0.1045	1
0.1051	0.852396	0.283257	0.850696	0.852396	0.1048	0.393575	0.953226	0.1055	1
0.1061	0.860165	0.276431	0.858556	0.860165	0.1058	0.39525	0.953548	0.1065	1
0.1071	0.867934	0.269605	0.866413	0.867934	0.1068	0.39695	0.953548	0.1075	1
0.1081	0.875703	0.262778	0.874272	0.875703	0.1078	0.398625	0.953871	0.1085	1
0.1091	0.883472	0.255952	0.882129	0.883472	0.1088	0.400325	0.953871	0.1095	1
0.1101	0.891241	0.249126	0.889988	0.891241	0.1098	0.402	0.954194	0.1106	1
0.1111	0.89901	0.242299	0.897845	0.89901	0.1108	0.4037	0.954194	0.1116	1
0.1121	0.906779	0.235473	0.905705	0.906779	0.1118	0.405375	0.954516	0.1126	1
0.1131	0.914544	0.228648	0.913562	0.914544	0.1128	0.407075	0.954516	0.1136	1
0.1141	0.922313	0.221822	0.921418	0.922313	0.1138	0.40875	0.954839	0.1146	1
0.1151	0.930082	0.214995	0.929278	0.930082	0.1149	0.41045	0.954839	0.1156	1
0.1161	0.937852	0.208169	0.937135	0.937852	0.1159	0.41215	0.955161	0.1166	1
0.1171	0.945621	0.201343	0.944994	0.945621	0.1169	0.413825	0.955161	0.1176	1
0.1181	0.95339	0.194517	0.952851	0.95339	0.1179	0.415525	0.955484	0.1186	1
0.1191	0.961159	0.18769	0.960711	0.961159	0.1189	0.4172	0.955484	0.1196	1
0.1201	0.968928	0.180864	0.968567	0.968928	0.1199	0.4189	0.955806	0.1206	1
0.1211	0.976693	0.174039	0.976427	0.976693	0.1209	0.420575	0.955806	0.1216	1
0.1221	0.984462	0.167213	0.984284	0.984462	0.1219	0.422275	0.956129	0.1226	1
0.1231	0.992231	0.160386	0.992143	0.992231	0.1229	0.42395	0.956129	0.1236	1
0.1241	1	0.15356	1	1	0.1239	0.42565	0.956129	0.1246	1
0.1251	1	0.15356	1	1	0.1249	0.427325	0.956452	0.1256	1
0.1261	0.996779	0.152524	0.99943	0.996779	0.1259	0.429025	0.956452	0.1266	1
0.1271	0.993563	0.151487	0.998864	0.993563	0.1269	0.4307	0.956774	0.1276	1
0.1281	0.990342	0.150451	0.998294	0.990342	0.1279	0.4324	0.956774	0.1286	1
0.1291	0.987122	0.149413	0.997727	0.987122	0.1289	0.434075	0.957097	0.1296	1
0.1301	0.983905	0.148377	0.997158	0.983905	0.1299	0.435775	0.957097	0.1307	1
0.1311	0.980685	0.14734	0.996591	0.980685	0.1309	0.43745	0.957419	0.1317	1
0.1321	0.977464	0.146304	0.996021	0.977464	0.1319	0.43915	0.957419	0.1327	1
0.1331	0.974247	0.145267	0.995452	0.974247	0.1329	0.440825	0.957742	0.1337	1
0.1341	0.971027	0.144231	0.994885	0.971027	0.1339	0.442525	0.957742	0.1347	1
0.1351	0.96781	0.143193	0.994315	0.96781	0.1349	0.4442	0.958065	0.1357	1
0.1361	0.96459	0.142156	0.993749	0.96459	0.136	0.4459	0.958065	0.1367	1
0.1371	0.961369	0.14112	0.993179	0.961369	0.137	0.4476	0.958387	0.1377	1
0.1381	0.958153	0.140083	0.992609	0.958153	0.138	0.449275	0.958387	0.1387	1
0.1391	0.954932	0.139047	0.992043	0.954932	0.139	0.450975	0.95871	0.1397	1
0.1401	0.951711	0.13801	0.991473	0.951711	0.14	0.45265	0.95871	0.1407	1
0.1411	0.948495	0.136973	0.990906	0.948495	0.141	0.45435	0.959032	0.1417	1
0.1421	0.945274	0.135936	0.990337	0.945274	0.142	0.456025	0.959032	0.1427	1
0.1431	0.942054	0.1349	0.98977	0.942054	0.143	0.457725	0.959355	0.1437	1
0.1441	0.938837	0.133863	0.9892	0.938837	0.144	0.4594	0.959355	0.1447	1
0.1451	0.935616	0.132827	0.988631	0.935616	0.145	0.4611	0.959677	0.1457	1
0.1461	0.932396	0.13179	0.988064	0.932396	0.146	0.462775	0.959677	0.1467	1
0.1471	0.929179	0.130753	0.987494	0.929179	0.147	0.464475	0.96	0.1477	1
0.1481	0.925959	0.129716	0.986928	0.925959	0.148	0.46615	0.96	0.1487	1
0.1491	0.922742	0.12868	0.986358	0.922742	0.149	0.46785	0.960323	0.1497	1
0.1502	0.919522	0.127643	0.985788	0.919522	0.15	0.469525	0.960323	0.1508	1
0.1512	0.916301	0.126607	0.985222	0.916301	0.151	0.471225	0.960323	0.1518	1
0.1522	0.913085	0.12557	0.984652	0.913085	0.152	0.4729	0.960645	0.1528	1
0.1532	0.909864	0.124532	0.984085	0.909864	0.153	0.4746	0.960645	0.1538	1
0.1542	0.906643	0.123496	0.983516	0.906643	0.154	0.476275	0.960968	0.1548	1
0.1552	0.903427	0.122459	0.982949	0.903427	0.155	0.477975	0.960968	0.1558	1
0.1562	0.900206	0.121423	0.982379	0.900206	0.156	0.47965	0.96129	0.1568	1
0.1572	0.896986	0.120386	0.98181	0.896986	0.1571	0.48135	0.96129	0.1578	1
0.1582	0.893769	0.11935	0.981243	0.893769	0.1581	0.48305	0.961613	0.1588	1
0.1592	0.890548	0.118313	0.980673	0.890548	0.1591	0.484725	0.961613	0.1598	1
0.1602	0.887328	0.117276	0.980106	0.887328	0.1601	0.486425	0.961935	0.1608	1
0.1612	0.884111	0.116239	0.979537	0.884111	0.1611	0.4881	0.961935	0.1618	1
0.1622	0.880891	0.115203	0.97897	0.880891	0.1621	0.4898	0.962258	0.1628	1
0.1632	0.87767	0.114166	0.9784	0.87767	0.1631	0.491475	0.962258	0.1638	1
0.1642	0.874454	0.11313	0.977831	0.874454	0.1641	0.493175	0.962581	0.1648	1
0.1652	0.871233	0.112093	0.977264	0.871233	0.1651	0.49485	0.962581	0.1658	1
0.1662	0.868016	0.111056	0.976694	0.868016	0.1661	0.49655	0.962903	0.1668	1
0.1672	0.864796	0.110019	0.976128	0.864796	0.1671	0.498225	0.962903	0.1678	1
0.1682	0.861575	0.108983	0.975558	0.861575	0.1681	0.499925	0.963226	0.1688	1
0.1692	0.858359	0.107946	0.974988	0.858359	0.1691	0.5016	0.963226	0.1698	1
0.1702	0.855138	0.10691	0.974422	0.855138	0.1701	0.5033	0.963548	0.1709	1
0.1712	0.851918	0.105873	0.973852	0.851918	0.1711	0.504975	0.963548	0.1719	1
0.1722	0.848701	0.104836	0.973285	0.848701	0.1721	0.506675	0.963871	0.1729	1
0.1732	0.84548	0.103799	0.972716	0.84548	0.1731	0.50835	0.963871	0.1739	1
0.1742	0.84226	0.102763	0.972149	0.84226	0.1741	0.51005	0.964194	0.1749	1
0.1752	0.839043	0.101726	0.971579	0.839043	0.1751	0.511725	0.964194	0.1759	1
0.1762	0.835823	0.100689	0.97101	0.835823	0.1761	0.513425	0.964516	0.1769	1
0.1772	0.832602	0.099653	0.970443	0.832602	0.1772	0.515125	0.964516	0.1779	1
0.1782	0.829386	0.0986154	0.969873	0.829386	0.1782	0.5168	0.964839	0.1789	1
0.1792	0.826165	0.0975789	0.969307	0.826165	0.1792	0.5185	0.964839	0.1799	1
0.1802	0.822948	0.0965424	0.968737	0.822948	0.1802	0.520175	0.964839	0.1809	1
0.1812	0.819728	0.0955059	0.968167	0.819728	0.1812	0.521875	0.965161	0.1819	1
0.1822	0.816507	0.0944694	0.967601	0.816507	0.1822	0.52355	0.965161	0.1829	1
0.1832	0.813291	0.0934329	0.967031	0.813291	0.1832	0.52525	0.965484	0.1839	1
0.1842	0.81007	0.0923952	0.966464	0.81007	0.1842	0.526925	0.965484	0.1849	1
0.1852	0.806849	0.0913587	0.965895	0.806849	0.1852	0.528625	0.965806	0.1859	1
0.1862	0.803633	0.0903222	0.965328	0.803633	0.1862	0.5303	0.965806	0.1869	1
0.1872	0.800412	0.0892857	0.964758	0.800412	0.1872	0.532	0.966129	0.1879	1
0.1882	0.797192	0.0882492	0.964189	0.797192	0.1882	0.533675	0.966129	0.1889	1
0.1892	0.793975	0.0872127	0.963622	0.793975	0.1892	0.535375	0.966452	0.1899	1
0.1902	0.790755	0.0861762	0.963052	0.790755	0.1902	0.53705	0.966452	0.191	1
0.1912	0.787534	0.0851386	0.962486	0.787534	0.1912	0.53875	0.966774	0.192	1
0.1922	0.784318	0.0841021	0.961916	0.784318	0.1922	0.540425	0.966774	0.193	1
0.1932	0.781097	0.0830656	0.961349	0.781097	0.1932	0.542125	0.967097	0.194	1
0.1942	0.777876	0.0820291	0.96078	0.777876	0.1942	0.5438	0.967097	0.195	1
0.1952	0.77466	0.0809926	0.96021	0.77466	0.1952	0.5455	0.967419	0.196	1
0.1962	0.771439	0.0799561	0.959643	0.771439	0.1962	0.547175	0.967419	0.197	1
0.1972	0.768223	0.0789184	0.959074	0.768223	0.1972	0.548875	0.967742	0.198	1
0.1982	0.765002	0.0778819	0.958507	0.765002	0.1983	0.550575	0.967742	0.199	1
0.1992	0.761781	0.0768454	0.957937	0.761781	0.1993	0.55225	0.968065	0.2	1
0.2002	0.758565	0.0758089	0.957368	0.758565	0.2003	0.55395	0.968065	0.2	1
0.2012	0.755344	0.0747724	0.956801	0.755344	0.2013	0.555625	0.968387	0.201	1
0.2022	0.752124	0.0737359	0.956231	0.752124	0.2023	0.557325	0.968387	0.202	1
0.2032	0.748907	0.0726983	0.955665	0.748907	0.2033	0.559	0.96871	0.203	1
0.2042	0.745687	0.0716618	0.955095	0.745687	0.2043	0.5607	0.96871	0.204	1
0.2052	0.742466	0.0706253	0.954528	0.742466	0.2053	0.562375	0.969032	0.205	1
0.2062	0.739249	0.0695888	0.953959	0.739249	0.2063	0.564075	0.969032	0.206	1
0.2072	0.736029	0.0685523	0.953389	0.736029	0.2073	0.56575	0.969355	0.2071	1
0.2082	0.732808	0.0675158	0.952822	0.732808	0.2083	0.56745	0.969355	0.2081	1
0.2092	0.729592	0.0664781	0.952253	0.729592	0.2093	0.569125	0.969355	0.2091	1
0.2102	0.726371	0.0654416	0.951686	0.726371	0.2103	0.570825	0.969677	0.2101	1
0.2112	0.723155	0.0644051	0.951116	0.723155	0.2113	0.5725	0.969677	0.2111	1
0.2122	0.719934	0.0633686	0.950547	0.719934	0.2123	0.5742	0.97	0.2121	1
0.2132	0.716713	0.0623321	0.94998	0.716713	0.2133	0.575875	0.97	0.2131	1
0.2142	0.713497	0.0612956	0.94941	0.713497	0.2143	0.577575	0.970323	0.2141	1
0.2152	0.710276	0.060258	0.948843	0.710276	0.2153	0.57925	0.970323	0.2151	1
0.2162	0.707056	0.0592215	0.948274	0.707056	0.2163	0.58095	0.970645	0.2161	1
0.2172	0.703839	0.058185	0.947707	0.703839	0.2173	0.582625	0.970645	0.2171	1
0.2182	0.700619	0.0571485	0.947138	0.700619	0.2183	0.584325	0.970968	0.2181	1
0.2192	0.697398	0.056112	0.946568	0.697398	0.2194	0.586025	0.970968	0.2192	1
0.2202	0.694181	0.0550755	0.946001	0.694181	0.2204	0.5877	0.97129	0.2202	1
0.2212	0.690961	0.054039	0.945432	0.690961	0.2214	0.5894	0.97129	0.2212	1
0.2222	0.68774	0.0530014	0.944865	0.68774	0.2224	0.591075	0.971613	0.2222	1
0.2232	0.684524	0.0519648	0.944295	0.684524	0.2234	0.592775	0.971613	0.2232	1
0.2242	0.681303	0.0509283	0.943728	0.681303	0.2244	0.59445	0.971935	0.2242	1
0.2252	0.678082	0.0498918	0.943159	0.678082	0.2254	0.59615	0.971935	0.2252	1
0.2262	0.674866	0.0488553	0.942589	0.674866	0.2264	0.597825	0.972258	0.2262	1
0.2272	0.671645	0.0478188	0.942022	0.671645	0.2274	0.599525	0.972258	0.2272	1
0.2282	0.668429	0.0467812	0.941453	0.668429	0.2284	0.6012	0.972581	0.2282	1
0.2292	0.665208	0.0457447	0.940886	0.665208	0.2294	0.6029	0.972581	0.2292	1
0.2302	0.661988	0.0447082	0.940316	0.661988	0.2304	0.604575	0.972903	0.2302	1
0.2312	0.658771	0.0436717	0.939747	0.658771	0.2314	0.606275	0.972903	0.2313	1
0.2322	0.655551	0.0426352	0.93918	0.655551	0.2324	0.60795	0.973226	0.2323	1
0.2332	0.65233	0.0415987	0.93861	0.65233	0.2334	0.60965	0.973226	0.2333	1
0.2342	0.649113	0.0405611	0.938044	0.649113	0.2344	0.611325	0.973548	0.2343	1
0.2352	0.645893	0.0395246	0.937474	0.645893	0.2354	0.613025	0.973548	0.2353	1
0.2362	0.642672	0.0384881	0.936907	0.642672	0.2364	0.6147	0.973548	0.2363	1
0.2372	0.639456	0.0374516	0.936338	0.639456	0.2374	0.6164	0.973871	0.2373	1
0.2382	0.636235	0.0364151	0.935768	0.636235	0.2384	0.618075	0.973871	0.2383	1
0.2392	0.633014	0.0353785	0.935201	0.633014	0.2394	0.619775	0.974194	0.2393	1
0.2402	0.629798	0.0343409	0.934632	0.629798	0.2405	0.621475	0.974194	0.2403	1
0.2412	0.626577	0.0333044	0.934065	0.626577	0.2415	0.62315	0.974516	0.2413	1
0.2422	0.623361	0.0322679	0.933495	0.623361	0.2425	0.62485	0.974516	0.2423	1
0.2432	0.62014	0.0312314	0.932926	0.62014	0.2435	0.626525	0.974839	0.2433	1
0.2442	0.61692	0.0301949	0.932359	0.61692	0.2445	0.628225	0.974839	0.2444	1
0.2452	0.613703	0.0291584	0.931789	0.613703	0.2455	0.6299	0.975161	0.2454	1
0.2462	0.610482	0.0281208	0.931223	0.610482	0.2465	0.6316	0.975161	0.2464	1
0.2472	0.607262	0.0270843	0.930653	0.607262	0.2475	0.633275	0.975484	0.2474	1
0.2482	0.604045	0.0260478	0.930086	0.604045	0.2485	0.634975	0.975484	0.2484	1
0.2492	0.600825	0.0250113	0.929517	0.600825	0.2495	0.63665	0.975806	0.2494	1
0.2503	0.600825	0.0250113	0.929517	0.600825	0.2505	0.63835	0.975806	0.2504	1
0.2513	0.598309	0.0250417	0.928021	0.598309	0.2515	0.640025	0.976129	0.2514	1
0.2523	0.59579	0.0250732	0.926525	0.59579	0.2525	0.641725	0.976129	0.2524	1
0.2533	0.593274	0.0251037	0.925029	0.593274	0.2535	0.6434	0.976452	0.2534	1
0.2543	0.590755	0.0251352	0.92353	0.590755	0.2545	0.6451	0.976452	0.2544	1
0.2553	0.588239	0.0251656	0.922034	0.588239	0.2555	0.646775	0.976774	0.2554	1
0.2563	0.58572	0.0251972	0.920538	0.58572	0.2565	0.648475	0.976774	0.2565	1
0.2573	0.583204	0.0252276	0.919042	0.583204	0.2575	0.65015	0.977097	0.2575	1
0.2583	0.580685	0.025258	0.917546	0.580685	0.2585	0.65185	0.977097	0.2585	1
0.2593	0.578169	0.0252895	0.91605	0.578169	0.2595	0.653525	0.977419	0.2595	1
0.2603	0.575649	0.02532	0.914551	0.575649	0.2606	0.655225	0.977419	0.2605	1
0.2613	0.573134	0.0253515	0.913055	0.573134	0.2616	0.656925	0.977742	0.2615	1
0.2623	0.570614	0.0253819	0.911559	0.570614	0.2626	0.6586	0.977742	0.2625	1
0.2633	0.568099	0.0254123	0.910063	0.568099	0.2636	0.6603	0.978065	0.2635	1
0.2643	0.565579	0.0254439	0.908567	0.565579	0.2646	0.661975	0.978065	0.2645	1
0.2653	0.563064	0.0254743	0.907071	0.563064	0.2656	0.663675	0.978065	0.2655	1
0.2663	0.560544	0.0255059	0.905572	0.560544	0.2666	0.66535	0.978387	0.2665	1
0.2673	0.558029	0.0255363	0.904077	0.558029	0.2676	0.66705	0.978387	0.2675	1
0.2683	0.555509	0.0255678	0.902581	0.555509	0.2686	0.668725	0.97871	0.2685	1
0.2693	0.552994	0.0255982	0.901085	0.552994	0.2696	0.670425	0.97871	0.2696	1
0.2703	0.550474	0.0256287	0.899589	0.550474	0.2706	0.6721	0.979032	0.2706	1
0.2713	0.547959	0.0256602	0.898093	0.547959	0.2716	0.6738	0.979032	0.2716	1
0.2723	0.545439	0.0256906	0.896594	0.545439	0.2726	0.675475	0.979355	0.2726	1
0.2733	0.542924	0.0257222	0.895098	0.542924	0.2736	0.677175	0.979355	0.2736	1
0.2743	0.540404	0.0257526	0.893602	0.540404	0.2746	0.67885	0.979677	0.2746	1
0.2753	0.537889	0.025783	0.892106	0.537889	0.2756	0.68055	0.979677	0.2756	1
0.2763	0.535369	0.0258146	0.89061	0.535369	0.2766	0.682225	0.98	0.2766	1
0.2773	0.532854	0.025845	0.889114	0.532854	0.2776	0.683925	0.98	0.2776	1
0.2783	0.530334	0.0258765	0.887615	0.530334	0.2786	0.6856	0.980323	0.2786	1
0.2793	0.527819	0.0259069	0.886119	0.527819	0.2796	0.6873	0.980323	0.2796	1
0.2803	0.525299	0.0259385	0.884623	0.525299	0.2806	0.688975	0.980645	0.2806	1
0.2813	0.522784	0.0259689	0.883127	0.522784	0.2817	0.690675	0.980645	0.2817	1
0.2823	0.520268	0.0259993	0.881631	0.520268	0.2827	0.692375	0.980968	0.2827	1
0.2833	0.517748	0.0260309	0.880135	0.517748	0.2837	0.69405	0.980968	0.2837	1
0.2843	0.515233	0.0260613	0.878639	0.515233	0.2847	0.69575	0.98129	0.2847	1
0.2853	0.512713	0.0260928	0.87714	0.512713	0.2857	0.697425	0.98129	0.2857	1
0.2863	0.510198	0.0261233	0.875644	0.510198	0.2867	0.699125	0.981613	0.2867	1
0.2873	0.507678	0.0261548	0.874148	0.507678	0.2877	0.7008	0.981613	0.2877	1
0.2883	0.505163	0.0261852	0.872652	0.505163	0.2887	0.7025	0.981935	0.2887	1
0.2893	0.502643	0.0262156	0.871157	0.502643	0.2897	0.704175	0.981935	0.2897	1
0.2903	0.500128	0.0262472	0.869661	0.500128	0.2907	0.705875	0.982258	0.2907	1
0.2913	0.497608	0.0262776	0.868162	0.497608	0.2917	0.70755	0.982258	0.2917	1
0.2923	0.495093	0.0263091	0.866666	0.495093	0.2927	0.70925	0.982258	0.2927	1
0.2933	0.492573	0.0263396	0.86517	0.492573	0.2937	0.710925	0.982581	0.2938	1
0.2943	0.490058	0.02637	0.863674	0.490058	0.2947	0.712625	0.982581	0.2948	1
0.2953	0.487538	0.0264015	0.862178	0.487538	0.2957	0.7143	0.982903	0.2958	1
0.2963	0.485023	0.026432	0.860682	0.485023	0.2967	0.716	0.982903	0.2968	1
0.2973	0.482503	0.0264635	0.859183	0.482503	0.2977	0.717675	0.983226	0.2978	1
0.2983	0.479988	0.0264939	0.857687	0.479988	0.2987	0.719375	0.983226	0.2988	1
0.2993	0.477468	0.0265255	0.856191	0.477468	0.2997	0.72105	0.983548	0.2998	1
0.3003	0.474953	0.0265559	0.854695	0.474953	0.3007	0.72275	0.983548	0.3008	1
0.3013	0.472433	0.0265863	0.853199	0.472433	0.3017	0.724425	0.983871	0.3018	1
0.3023	0.469918	0.0266178	0.851703	0.469918	0.3028	0.726125	0.983871	0.3028	1
0.3033	0.467398	0.0266483	0.850204	0.467398	0.3038	0.727825	0.984194	0.3038	1
0.3043	0.464882	0.0266798	0.848708	0.464882	0.3048	0.7295	0.984194	0.3048	1
0.3053	0.462363	0.0267102	0.847212	0.462363	0.3058	0.7312	0.984516	0.3058	1
0.3063	0.459847	0.0267406	0.845716	0.459847	0.3068	0.732875	0.984516	0.3069	1
0.3073	0.457328	0.0267722	0.84422	0.457328	0.3078	0.734575	0.984839	0.3079	1
0.3083	0.454812	0.0268026	0.842724	0.454812	0.3088	0.73625	0.984839	0.3089	1
0.3093	0.452293	0.0268342	0.841226	0.452293	0.3098	0.73795	0.985161	0.3099	1
0.3103	0.449777	0.0268646	0.83973	0.449777	0.3108	0.739625	0.985161	0.3109	1
0.3113	0.447258	0.0268961	0.838234	0.447258	0.3118	0.741325	0.985484	0.3119	1
0.3123	0.444742	0.0269265	0.836738	0.444742	0.3128	0.743	0.985484	0.3129	1
0.3133	0.442227	0.026957	0.835242	0.442227	0.3138	0.7447	0.985806	0.3139	1
0.3143	0.439707	0.0269885	0.833746	0.439707	0.3148	0.746375	0.985806	0.3149	1
0.3153	0.437192	0.0270189	0.83225	0.437192	0.3158	0.748075	0.986129	0.3159	1
0.3163	0.434672	0.0270505	0.830751	0.434672	0.3168	0.74975	0.986129	0.3169	1
0.3173	0.432157	0.0270809	0.829255	0.432157	0.3178	0.75145	0.986452	0.3179	1
0.3183	0.429637	0.0271124	0.827759	0.429637	0.3188	0.753125	0.986452	0.319	1
0.3193	0.427122	0.0271429	0.826263	0.427122	0.3198	0.754825	0.986774	0.32	1
0.3203	0.424602	0.0271733	0.824767	0.424602	0.3208	0.7565	0.986774	0.321	1
0.3213	0.422087	0.0272048	0.823271	0.422087	0.3218	0.7582	0.986774	0.322	1
0.3223	0.419567	0.0272352	0.821772	0.419567	0.3228	0.759875	0.987097	0.323	1
0.3233	0.417052	0.0272668	0.820276	0.417052	0.3239	0.761575	0.987097	0.324	1
0.3243	0.414532	0.0272972	0.81878	0.414532	0.3249	0.763275	0.987419	0.325	1
0.3253	0.412016	0.0273276	0.817284	0.412016	0.3259	0.76495	0.987419	0.325	1
0.3263	0.409497	0.0273592	0.815788	0.409497	0.3269	0.76665	0.987742	0.326	0.997692
0.3273	0.406981	0.0273896	0.814292	0.406981	0.3279	0.768325	0.987742	0.327	0.995385
0.3283	0.404462	0.0274211	0.812793	0.404462	0.3289	0.770025	0.988065	0.328	0.993077
0.3293	0.401946	0.0274516	0.811297	0.401946	0.3299	0.7717	0.988065	0.329	0.990923
0.3303	0.399427	0.0274831	0.809801	0.399427	0.3309	0.7734	0.988387	0.33	0.988615
0.3313	0.396911	0.0275135	0.808306	0.396911	0.3319	0.775075	0.988387	0.331	0.986308
0.3323	0.394392	0.0275439	0.80681	0.394392	0.3329	0.776775	0.98871	0.332	0.984
0.3333	0.391876	0.0275755	0.805314	0.391876	0.3339	0.77845	0.98871	0.333	0.981692
0.3343	0.389357	0.0276059	0.803815	0.389357	0.3349	0.78015	0.989032	0.334	0.979385
0.3353	0.386841	0.0276374	0.802319	0.386841	0.3359	0.781825	0.989032	0.335	0.977077
0.3363	0.384322	0.0276679	0.800823	0.384322	0.3369	0.783525	0.989355	0.336	0.974923
0.3373	0.381806	0.0276983	0.799327	0.381806	0.3379	0.7852	0.989355	0.337	0.972615
0.3383	0.379287	0.0277298	0.797831	0.379287	0.3389	0.7869	0.989677	0.3381	0.970308
0.3393	0.376771	0.0277603	0.796335	0.376771	0.3399	0.788575	0.989677	0.3391	0.968
0.3403	0.374252	0.0277918	0.794836	0.374252	0.3409	0.790275	0.99	0.3401	0.965692
0.3413	0.371736	0.0278222	0.79334	0.371736	0.3419	0.79195	0.99	0.3411	0.963385
0.3423	0.369216	0.0278538	0.791844	0.369216	0.3429	0.79365	0.990323	0.3421	0.961077
0.3433	0.366701	0.0278842	0.790348	0.366701	0.344	0.79535	0.990323	0.3431	0.958923
0.3443	0.364186	0.0279146	0.788852	0.364186	0.345	0.797025	0.990645	0.3441	0.956615
0.3453	0.361666	0.0279461	0.787356	0.361666	0.346	0.798725	0.990645	0.3451	0.954308
0.3463	0.359151	0.0279766	0.78586	0.359151	0.347	0.8004	0.990968	0.3461	0.952
0.3473	0.356631	0.0280081	0.784361	0.356631	0.348	0.8021	0.990968	0.3471	0.949692
0.3483	0.354115	0.0280385	0.782865	0.354115	0.349	0.803775	0.99129	0.3481	0.947385
0.3493	0.351596	0.0280701	0.781369	0.351596	0.35	0.805475	0.99129	0.3491	0.945077
0.3504	0.34908	0.0281005	0.779873	0.34908	0.351	0.80715	0.99129	0.3501	0.942923
0.3514	0.346561	0.0281309	0.778377	0.346561	0.352	0.80885	0.991613	0.3511	0.940615
0.3524	0.344045	0.0281625	0.776881	0.344045	0.353	0.810525	0.991613	0.3521	0.938308
0.3534	0.341526	0.0281929	0.775383	0.341526	0.354	0.812225	0.991935	0.3531	0.936
0.3544	0.33901	0.0282244	0.773887	0.33901	0.355	0.8139	0.991935	0.3541	0.933692
0.3554	0.336491	0.0282548	0.772391	0.336491	0.356	0.8156	0.992258	0.3551	0.931385
0.3564	0.333975	0.0282853	0.770895	0.333975	0.357	0.817275	0.992258	0.3561	0.929077
0.3574	0.331456	0.0283168	0.769399	0.331456	0.358	0.818975	0.992581	0.3571	0.926769
0.3584	0.32894	0.0283472	0.767903	0.32894	0.359	0.82065	0.992581	0.3581	0.924615
0.3594	0.326421	0.0283788	0.766404	0.326421	0.36	0.82235	0.992903	0.3591	0.922308
0.3604	0.323905	0.0284092	0.764908	0.323905	0.361	0.824025	0.992903	0.3601	0.92
0.3614	0.321386	0.0284407	0.763412	0.321386	0.362	0.825725	0.993226	0.3611	0.917692
0.3624	0.31887	0.0284712	0.761916	0.31887	0.363	0.8274	0.993226	0.3621	0.915385
0.3634	0.316351	0.0285016	0.76042	0.316351	0.364	0.8291	0.993548	0.3632	0.913077
0.3644	0.313835	0.0285331	0.758924	0.313835	0.3651	0.8308	0.993548	0.3642	0.910769
0.3654	0.311315	0.0285635	0.757425	0.311315	0.3661	0.832475	0.993871	0.3652	0.908615
0.3664	0.3088	0.0285951	0.755929	0.3088	0.3671	0.834175	0.993871	0.3662	0.906308
0.3674	0.30628	0.0286255	0.754433	0.30628	0.3681	0.83585	0.994194	0.3672	0.904
0.3684	0.303765	0.0286559	0.752937	0.303765	0.3691	0.83755	0.994194	0.3682	0.901692
0.3694	0.301245	0.0286875	0.751441	0.301245	0.3701	0.839225	0.994516	0.3692	0.899385
0.3704	0.29873	0.0287179	0.749945	0.29873	0.3711	0.840925	0.994516	0.3702	0.897077
0.3714	0.29621	0.0287494	0.748446	0.29621	0.3721	0.8426	0.994839	0.3712	0.894769
0.3724	0.293695	0.0287799	0.746951	0.293695	0.3731	0.8443	0.994839	0.3722	0.892615
0.3734	0.291175	0.0288114	0.745455	0.291175	0.3741	0.845975	0.995161	0.3732	0.890308
0.3744	0.28866	0.0288418	0.743959	0.28866	0.3751	0.847675	0.995161	0.3742	0.888
0.3754	0.288664	0.0288418	0.743959	0.28866	0.3761	0.84935	0.995484	0.3752	0.885692
0.3764	0.286866	0.0287911	0.742952	0.286866	0.3771	0.85105	0.995484	0.3762	0.883385
0.3774	0.285076	0.0287404	0.741945	0.285076	0.3781	0.852725	0.995484	0.3772	0.881077
0.3784	0.283282	0.0286897	0.740938	0.283282	0.3791	0.854425	0.995806	0.3782	0.878769
0.3794	0.281489	0.0286379	0.739931	0.281489	0.3801	0.8561	0.995806	0.3792	0.876615
0.3804	0.279699	0.0285872	0.738924	0.279699	0.3811	0.8578	0.996129	0.3802	0.874308
0.3814	0.277905	0.0285365	0.737917	0.277905	0.3821	0.859475	0.996129	0.3812	0.872
0.3824	0.276111	0.0284858	0.73691	0.276111	0.3831	0.861175	0.996452	0.3822	0.869692
0.3834	0.274322	0.0284351	0.735903	0.274322	0.3841	0.86285	0.996452	0.3832	0.867385
0.3844	0.272528	0.0283844	0.734896	0.272528	0.3851	0.86455	0.996774	0.3842	0.865077
0.3854	0.270734	0.0283326	0.73389	0.270734	0.3862	0.86625	0.996774	0.3852	0.862769
0.3864	0.268944	0.0282819	0.732883	0.268944	0.3872	0.867925	0.997097	0.3862	0.860615
0.3874	0.267151	0.0282312	0.731876	0.267151	0.3882	0.869625	0.997097	0.3872	0.858308
0.3884	0.265357	0.0281805	0.730869	0.265357	0.3892	0.8713	0.997419	0.3883	0.856
0.3894	0.263567	0.0281298	0.729862	0.263567	0.3902	0.873	0.997419	0.3893	0.853692
0.3904	0.261773	0.0280791	0.728855	0.261773	0.3912	0.874675	0.997742	0.3903	0.851385
0.3914	0.259979	0.0280273	0.727848	0.259979	0.3922	0.876375	0.997742	0.3913	0.849077
0.3924	0.258186	0.0279766	0.726841	0.258186	0.3932	0.87805	0.998065	0.3923	0.846769
0.3934	0.256396	0.0279259	0.725834	0.256396	0.3942	0.87975	0.998065	0.3933	0.844615
0.3944	0.254602	0.0278752	0.724827	0.254602	0.3952	0.881425	0.998387	0.3943	0.842308
0.3954	0.252808	0.0278245	0.72382	0.252808	0.3962	0.883125	0.998387	0.3953	0.84
0.3964	0.251019	0.0277738	0.722814	0.251019	0.3972	0.8848	0.99871	0.3963	0.837692
0.3974	0.249225	0.0277219	0.721807	0.249225	0.3982	0.8865	0.99871	0.3973	0.835385
0.3984	0.247431	0.0276712	0.7208	0.247431	0.3992	0.888175	0.999032	0.3983	0.833077
0.3994	0.245641	0.0276205	0.719793	0.245641	0.4002	0.889875	0.999032	0.3993	0.830769
0.4004	0.243847	0.0275699	0.718786	0.243847	0.4012	0.89155	0.999355	0.4003	0.828615
0.4014	0.242054	0.0275192	0.717779	0.242054	0.4022	0.89325	0.999355	0.4013	0.826308
0.4024	0.240264	0.0274685	0.716772	0.240264	0.4032	0.894925	0.999677	0.4023	0.824
0.4034	0.23847	0.0274166	0.715765	0.23847	0.4042	0.896625	0.999677	0.4033	0.821692
0.4044	0.236676	0.0273659	0.714758	0.236676	0.4052	0.8983	1	0.4043	0.819385
0.4054	0.234887	0.0273152	0.713751	0.234887	0.4063	0.9	1	0.4053	0.817077
0.4064	0.233093	0.0272645	0.712745	0.233093	0.4063	0.9	1	0.4063	0.814769
0.4074	0.231299	0.0272138	0.711738	0.231299	0.4073	0.8992	0.99871	0.4073	0.812615
0.4084	0.229509	0.0271631	0.710731	0.229509	0.4083	0.8984	0.997742	0.4083	0.810308
0.4094	0.227715	0.0271124	0.709724	0.227715	0.4093	0.8976	0.996452	0.4093	0.808
0.4104	0.225922	0.0270606	0.708717	0.225922	0.4103	0.8968	0.995161	0.4103	0.805692
0.4114	0.224132	0.0270099	0.70771	0.224132	0.4113	0.896	0.993871	0.4113	0.803385
0.4124	0.222338	0.0269592	0.706703	0.222338	0.4123	0.895175	0.992903	0.4123	0.801077
0.4134	0.220544	0.0269085	0.705696	0.220544	0.4133	0.894375	0.991613	0.4134	0.798769
0.4144	0.218755	0.0268578	0.704689	0.218755	0.4143	0.893575	0.990323	0.4144	0.796615
0.4154	0.216961	0.0268071	0.703682	0.216961	0.4153	0.892775	0.989032	0.4154	0.794308
0.4164	0.215167	0.0267553	0.702675	0.215167	0.4163	0.891975	0.988065	0.4164	0.792
0.4174	0.213377	0.0267046	0.701669	0.213377	0.4173	0.891175	0.986774	0.4174	0.789692
0.4184	0.211584	0.0266539	0.700662	0.211584	0.4183	0.890375	0.985484	0.4184	0.787385
0.4194	0.20979	0.0266032	0.699655	0.20979	0.4193	0.889575	0.984194	0.4194	0.785077
0.4204	0.208	0.0265525	0.698648	0.208	0.4203	0.888775	0.983226	0.4204	0.782769
0.4214	0.206206	0.0265018	0.697641	0.206206	0.4213	0.887975	0.981935	0.4214	0.780462
0.4224	0.204412	0.02645	0.696634	0.204412	0.4223	0.887175	0.980645	0.4224	0.778308
0.4234	0.202619	0.0263993	0.695627	0.202619	0.4233	0.886375	0.979355	0.4234	0.776
0.4244	0.200829	0.0263486	0.69462	0.200829	0.4243	0.88555	0.978387	0.4244	0.773692
0.4254	0.199035	0.0262979	0.693613	0.199035	0.4253	0.88475	0.977097	0.4254	0.771385
0.4264	0.197241	0.0262472	0.692606	0.197241	0.4263	0.88395	0.975806	0.4264	0.769077
0.4274	0.195452	0.0261965	0.6916	0.195452	0.4273	0.88315	0.974516	0.4274	0.766769
0.4284	0.193658	0.0261447	0.690593	0.193658	0.4283	0.88235	0.973548	0.4284	0.764462
0.4294	0.191864	0.026094	0.689586	0.191864	0.4293	0.88155	0.972258	0.4294	0.762308
0.4304	0.190074	0.0260433	0.688579	0.190074	0.4303	0.88075	0.970968	0.4304	0.76
0.4314	0.18828	0.0259926	0.687572	0.18828	0.4313	0.87995	0.969677	0.4314	0.757692
0.4324	0.186487	0.0259419	0.686565	0.186487	0.4323	0.87915	0.96871	0.4324	0.755385
0.4334	0.184697	0.0258912	0.685558	0.184697	0.4333	0.87835	0.967419	0.4334	0.753077
0.4344	0.182903	0.0258393	0.684551	0.182903	0.4343	0.87755	0.966129	0.4344	0.750769
0.4354	0.181109	0.0257886	0.683544	0.181109	0.4353	0.87675	0.964839	0.4354	0.748462
0.4364	0.17932	0.0257379	0.682537	0.17932	0.4363	0.875925	0.963871	0.4364	0.746308
0.4374	0.177526	0.0256872	0.68153	0.177526	0.4373	0.875125	0.962581	0.4374	0.744
0.4384	0.175732	0.0256365	0.680524	0.175732	0.4383	0.874325	0.96129	0.4385	0.741692
0.4394	0.173942	0.0255858	0.679517	0.173942	0.4393	0.873525	0.96	0.4395	0.739385
0.4404	0.172148	0.0255352	0.67851	0.172148	0.4403	0.872725	0.959032	0.4405	0.737077
0.4414	0.170355	0.0254833	0.677503	0.170355	0.4413	0.871925	0.957742	0.4415	0.734769
0.4424	0.168565	0.0254326	0.676496	0.168565	0.4423	0.871125	0.956452	0.4425	0.732462
0.4434	0.166771	0.0253819	0.675489	0.166771	0.4433	0.870325	0.955161	0.4435	0.730308
0.4444	0.164977	0.0253312	0.674482	0.164977	0.4444	0.869525	0.954194	0.4445	0.728
0.4454	0.163188	0.0252805	0.673475	0.163188	0.4454	0.868725	0.952903	0.4455	0.725692
0.4464	0.161394	0.0252298	0.672468	0.161394	0.4464	0.867925	0.951613	0.4465	0.723385
0.4474	0.1596	0.025178	0.671461	0.1596	0.4474	0.8671	0.950645	0.4475	0.721077
0.4484	0.15781	0.0251273	0.670455	0.15781	0.4484	0.8663	0.949355	0.4485	0.718769
0.4494	0.156016	0.0250766	0.669448	0.156016	0.4494	0.8655	0.948065	0.4495	0.716462
0.4505	0.154223	0.0250259	0.668441	0.154223	0.4504	0.8647	0.946774	0.4505	0.714308
0.4515	0.152433	0.0249752	0.667434	0.152433	0.4514	0.8639	0.945806	0.4515	0.712
0.4525	0.150639	0.0249245	0.666427	0.150639	0.4524	0.8631	0.944516	0.4525	0.709692
0.4535	0.148845	0.0248727	0.66542	0.148845	0.4534	0.8623	0.943226	0.4535	0.707385
0.4545	0.147052	0.024822	0.664413	0.147052	0.4544	0.8615	0.941935	0.4545	0.705077
0.4555	0.145262	0.0247713	0.663406	0.145262	0.4554	0.8607	0.940968	0.4555	0.702769
0.4565	0.143468	0.0247206	0.662399	0.143468	0.4564	0.8599	0.939677	0.4565	0.700462
0.4575	0.141674	0.0246699	0.661392	0.141674	0.4574	0.8591	0.938387	0.4575	0.698308
0.4585	0.139885	0.0246192	0.660386	0.139885	0.4584	0.8583	0.937097	0.4585	0.696
0.4595	0.138091	0.0245674	0.659379	0.138091	0.4594	0.857475	0.936129	0.4595	0.693692
0.4605	0.136297	0.0245167	0.658372	0.136297	0.4604	0.856675	0.934839	0.4605	0.691385
0.4615	0.134507	0.024466	0.657365	0.134507	0.4614	0.855875	0.933548	0.4615	0.689077
0.4625	0.132713	0.0244153	0.656358	0.132713	0.4624	0.855075	0.932258	0.4626	0.686769
0.4635	0.13092	0.0243646	0.655351	0.13092	0.4634	0.854275	0.93129	0.4636	0.684462
0.4645	0.12913	0.0243139	0.654344	0.12913	0.4644	0.853475	0.93	0.4646	0.682308
0.4655	0.127336	0.0242621	0.653337	0.127336	0.4654	0.852675	0.92871	0.4656	0.68
0.4665	0.125542	0.0242114	0.65233	0.125542	0.4664	0.851875	0.927419	0.4666	0.677692
0.4675	0.123753	0.0241607	0.651323	0.123753	0.4674	0.851075	0.926452	0.4676	0.675385
0.4685	0.121959	0.02411	0.650316	0.121959	0.4684	0.850275	0.925161	0.4686	0.673077
0.4695	0.120165	0.0240593	0.64931	0.120165	0.4694	0.849475	0.923871	0.4696	0.670769
0.4705	0.118375	0.0240086	0.648303	0.118375	0.4704	0.848675	0.922581	0.4706	0.668462
0.4715	0.116581	0.0239579	0.647296	0.116581	0.4714	0.84785	0.921613	0.4716	0.666308
0.4725	0.114788	0.023906	0.646289	0.114788	0.4724	0.84705	0.920323	0.4726	0.664
0.4735	0.112998	0.0238553	0.645282	0.112998	0.4734	0.84625	0.919032	0.4736	0.661692
0.4745	0.111204	0.0238046	0.644275	0.111204	0.4744	0.84545	0.917742	0.4746	0.659385
0.4755	0.10941	0.0237539	0.643268	0.10941	0.4754	0.84465	0.916774	0.4756	0.657077
0.4765	0.107621	0.0237032	0.642261	0.107621	0.4764	0.84385	0.915484	0.4766	0.654769
0.4775	0.105827	0.0236525	0.641254	0.105827	0.4774	0.84305	0.914194	0.4776	0.652462
0.4785	0.104033	0.0236007	0.640247	0.104033	0.4784	0.84225	0.912903	0.4786	0.650308
0.4795	0.102243	0.02355	0.639241	0.102243	0.4794	0.84145	0.911935	0.4796	0.648
0.4805	0.100449	0.0234993	0.638234	0.100449	0.4804	0.84065	0.910645	0.4806	0.645692
0.4815	0.0986557	0.0234486	0.637227	0.0986557	0.4815	0.83985	0.909355	0.4816	0.643385
0.4825	0.096866	0.0233979	0.63622	0.096866	0.4825	0.839025	0.908387	0.4826	0.641077
0.4835	0.0950722	0.0233472	0.635213	0.0950722	0.4835	0.838225	0.907097	0.4836	0.638769
0.4845	0.0932784	0.0232954	0.634206	0.0932784	0.4845	0.837425	0.905806	0.4846	0.636462
0.4855	0.0914845	0.0232447	0.633199	0.0914845	0.4855	0.836625	0.904516	0.4856	0.634154
0.4865	0.0896948	0.023194	0.632192	0.0896948	0.4865	0.835825	0.903548	0.4866	0.632
0.4875	0.087901	0.0231433	0.631185	0.087901	0.4875	0.835025	0.902258	0.4877	0.629692
0.4885	0.0861072	0.0230926	0.630178	0.0861072	0.4885	0.834225	0.900968	0.4887	0.627385
0.4895	0.0843175	0.0230419	0.629171	0.0843175	0.4895	0.833425	0.899677	0.4897	0.625077
0.4905	0.0825237	0.0229901	0.628165	0.0825237	0.4905	0.832625	0.89871	0.4907	0.622769
0.4915	0.0807299	0.0229394	0.627158	0.0807299	0.4915	0.831825	0.897419	0.4917	0.620462
0.4925	0.0789402	0.0228887	0.626151	0.0789402	0.4925	0.831025	0.896129	0.4927	0.618154
0.4935	0.0771464	0.022838	0.625144	0.0771464	0.4935	0.830225	0.894839	0.4937	0.616
0.4945	0.0753526	0.0227873	0.624137	0.0753526	0.4945	0.8294	0.893871	0.4947	0.613692
0.4955	0.0735629	0.0227366	0.62313	0.0735629	0.4955	0.8286	0.892581	0.4957	0.611385
0.4965	0.0717691	0.0226848	0.622123	0.0717691	0.4965	0.8278	0.89129	0.4967	0.609077
0.4975	0.0699753	0.0226341	0.621116	0.0699753	0.4975	0.827	0.89	0.4977	0.606769
0.4985	0.0681856	0.0225834	0.620109	0.0681856	0.4985	0.8262	0.889032	0.4987	0.604462
0.4995	0.0663918	0.0225327	0.619102	0.0663918	0.4995	0.8254	0.887742	0.4997	0.602154
0.5005	0.0663918	0.0225327	0.619102	0.0663918	0.5005	0.8246	0.886452	0.5007	0.6
0.5015	0.0662969	0.0224313	0.616795	0.0662969	0.5015	0.8238	0.885161	0.5017	0.597692
0.5025	0.0662062	0.022331	0.614485	0.0662062	0.5025	0.823	0.884194	0.5027	0.595385
0.5035	0.0661113	0.0222296	0.612178	0.0661113	0.5035	0.8222	0.882903	0.5037	0.593077
0.5045	0.0660206	0.0221293	0.609868	0.0660206	0.5045	0.8214	0.881613	0.5047	0.590769
0.5055	0.0659258	0.0220279	0.60756	0.0659258	0.5055	0.8206	0.880323	0.5057	0.588462
0.5065	0.0658351	0.0219277	0.60525	0.0658351	0.5065	0.819775	0.879355	0.5067	0.586154
0.5075	0.0657402	0.0218263	0.602943	0.0657402	0.5075	0.818975	0.878065	0.5077	0.584
0.5085	0.0656454	0.021726	0.600636	0.0656454	0.5085	0.818175	0.876774	0.5087	0.581692
0.5095	0.0655546	0.0216246	0.598326	0.0655546	0.5095	0.817375	0.875484	0.5097	0.579385
0.5105	0.0654598	0.0215243	0.596018	0.0654598	0.5105	0.816575	0.874516	0.5107	0.577077
0.5115	0.0653691	0.0214229	0.593708	0.0653691	0.5115	0.815775	0.873226	0.5117	0.574769
0.5125	0.0652742	0.0213227	0.591401	0.0652742	0.5125	0.814975	0.871935	0.5128	0.572462
0.5135	0.0651794	0.0212213	0.589094	0.0651794	0.5135	0.814175	0.870645	0.5138	0.570154
0.5145	0.0650887	0.021121	0.586784	0.0650887	0.5145	0.813375	0.869677	0.5148	0.568
0.5155	0.0649938	0.0210196	0.584476	0.0649938	0.5155	0.812575	0.868387	0.5158	0.565692
0.5165	0.0649031	0.0209193	0.582166	0.0649031	0.5165	0.811775	0.867097	0.5168	0.563385
0.5175	0.0648082	0.0208179	0.579859	0.0648082	0.5175	0.810975	0.865806	0.5178	0.561077
0.5185	0.0647175	0.0207177	0.577549	0.0647175	0.5185	0.81015	0.864839	0.5188	0.558769
0.5195	0.0646227	0.0206163	0.575242	0.0646227	0.5196	0.80935	0.863548	0.5198	0.556462
0.5205	0.0645278	0.020516	0.572934	0.0645278	0.5206	0.80855	0.862258	0.5208	0.554154
0.5215	0.0644371	0.0204146	0.570624	0.0644371	0.5216	0.80775	0.86129	0.5218	0.552
0.5225	0.0643423	0.0203143	0.568317	0.0643423	0.5226	0.80695	0.86	0.5228	0.549692
0.5235	0.0642515	0.0202129	0.566007	0.0642515	0.5236	0.80615	0.85871	0.5238	0.547385
0.5245	0.0641567	0.0201127	0.5637	0.0641567	0.5246	0.80535	0.857419	0.5248	0.545077
0.5255	0.0640619	0.0200113	0.561392	0.0640619	0.5256	0.80455	0.856452	0.5258	0.542769
0.5265	0.0639711	0.019911	0.559082	0.0639711	0.5266	0.80375	0.855161	0.5268	0.540462
0.5275	0.0638763	0.0198096	0.556775	0.0638763	0.5276	0.80295	0.853871	0.5278	0.538154
0.5285	0.0637856	0.0197093	0.554465	0.0637856	0.5286	0.80215	0.852581	0.5288	0.536
0.5295	0.0636907	0.0196079	0.552158	0.0636907	0.5296	0.801325	0.851613	0.5298	0.533692
0.5305	0.0636	0.0195077	0.549848	0.0636	0.5306	0.800525	0.850323	0.5308	0.531385
0.5315	0.0635052	0.0194063	0.54754	0.0635052	0.5316	0.799725	0.849032	0.5318	0.529077
0.5325	0.0634103	0.0193049	0.545233	0.0634103	0.5326	0.798925	0.847742	0.5328	0.526769
0.5335	0.0633196	0.0192046	0.542923	0.0633196	0.5336	0.798125	0.846774	0.5338	0.524462
0.5345	0.0632247	0.0191032	0.540616	0.0632247	0.5346	0.797325	0.845484	0.5348	0.522154
0.5355	0.063134	0.0190029	0.538306	0.063134	0.5356	0.796525	0.844194	0.5358	0.52
0.5365	0.0630392	0.0189015	0.535998	0.0630392	0.5366	0.795725	0.842903	0.5368	0.517692
0.5375	0.0629485	0.0188013	0.533688	0.0629485	0.5376	0.794925	0.841935	0.5379	0.515385
0.5385	0.0628536	0.0186999	0.531381	0.0628536	0.5386	0.794125	0.840645	0.5389	0.513077
0.5395	0.0627588	0.0185996	0.529074	0.0627588	0.5396	0.793325	0.839355	0.5399	0.510769
0.5405	0.062668	0.0184982	0.526764	0.062668	0.5406	0.792525	0.838065	0.5409	0.508462
0.5415	0.0625732	0.0183979	0.524456	0.0625732	0.5416	0.7917	0.837097	0.5419	0.506154
0.5425	0.0624825	0.0182965	0.522146	0.0624825	0.5426	0.7909	0.835806	0.5429	0.504
0.5435	0.0623876	0.0181963	0.519839	0.0623876	0.5436	0.7901	0.834516	0.5439	0.501692
0.5445	0.0622928	0.0180949	0.517532	0.0622928	0.5446	0.7893	0.833226	0.5449	0.499385
0.5455	0.0622021	0.0179946	0.515222	0.0622021	0.5456	0.7885	0.832258	0.5459	0.497077
0.5465	0.0621072	0.0178932	0.512914	0.0621072	0.5466	0.7877	0.830968	0.5469	0.494769
0.5475	0.0620165	0.0177929	0.510604	0.0620165	0.5476	0.7869	0.829677	0.5479	0.492462
0.5485	0.0619216	0.0176915	0.508297	0.0619216	0.5486	0.7861	0.828387	0.5489	0.490154
0.5495	0.0618309	0.0175913	0.505987	0.0618309	0.5496	0.7853	0.827419	0.5499	0.487846
0.5506	0.0617361	0.0174899	0.50368	0.0617361	0.5506	0.7845	0.826129	0.5509	0.485692
0.5516	0.0616412	0.0173896	0.501372	0.0616412	0.5516	0.7837	0.824839	0.5519	0.483385
0.5526	0.0615505	0.0172882	0.499062	0.0615505	0.5526	0.7829	0.823548	0.5529	0.481077
0.5536	0.0614557	0.0171879	0.496755	0.0614557	0.5536	0.782075	0.822581	0.5539	0.478769
0.5546	0.0613649	0.0170865	0.494445	0.0613649	0.5546	0.781275	0.82129	0.5549	0.476462
0.5556	0.0612701	0.0169863	0.492138	0.0612701	0.5556	0.780475	0.82	0.5559	0.474154
0.5566	0.0611753	0.0168849	0.48983	0.0611753	0.5567	0.779675	0.819032	0.5569	0.471846
0.5576	0.0610845	0.0167846	0.48752	0.0610845	0.5577	0.778875	0.817742	0.5579	0.469692
0.5586	0.0609897	0.0166832	0.485213	0.0609897	0.5587	0.778075	0.816452	0.5589	0.467385
0.5596	0.060899	0.0165829	0.482903	0.060899	0.5597	0.777275	0.815161	0.5599	0.465077
0.5606	0.0608041	0.0164815	0.480596	0.0608041	0.5607	0.776475	0.814194	0.5609	0.462769
0.5616	0.0607134	0.0163813	0.478285	0.0607134	0.5617	0.775675	0.812903	0.5619	0.460462
0.5626	0.0606186	0.0162799	0.475978	0.0606186	0.5627	0.774875	0.811613	0.563	0.458154
0.5636	0.0605237	0.0161785	0.473671	0.0605237	0.5637	0.774075	0.810323	0.564	0.455846
0.5646	0.060433	0.0160782	0.471361	0.060433	0.5647	0.77325	0.809355	0.565	0.453692
0.5656	0.0603381	0.0159768	0.469054	0.0603381	0.5657	0.77245	0.808065	0.566	0.451385
0.5666	0.0602474	0.0158765	0.466743	0.0602474	0.5667	0.77165	0.806774	0.567	0.449077
0.5676	0.0601526	0.0157751	0.464436	0.0601526	0.5677	0.77085	0.805484	0.568	0.446769
0.5686	0.0600619	0.0156749	0.462126	0.0600619	0.5687	0.77005	0.804516	0.569	0.444462
0.5696	0.059967	0.0155735	0.459819	0.059967	0.5697	0.76925	0.803226	0.57	0.442154
0.5706	0.0598722	0.0154732	0.457512	0.0598722	0.5707	0.76845	0.801935	0.571	0.439846
0.5716	0.0597814	0.0153718	0.455201	0.0597814	0.5717	0.76765	0.800645	0.572	0.437692
0.5726	0.0596866	0.0152715	0.452894	0.0596866	0.5727	0.76685	0.799677	0.573	0.435385
0.5736	0.0595959	0.0151701	0.450584	0.0595959	0.5737	0.76605	0.798387	0.574	0.433077
0.5746	0.059501	0.0150699	0.448277	0.059501	0.5747	0.76525	0.797097	0.575	0.430769
0.5756	0.0594062	0.0149685	0.44597	0.0594062	0.5757	0.76445	0.795806	0.575	0.430769
0.5766	0.0593155	0.0148682	0.443659	0.0593155	0.5767	0.763625	0.794839	0.576	0.429231
0.5776	0.0592206	0.0147668	0.441352	0.0592206	0.5777	0.762825	0.793548	0.577	0.427692
0.5786	0.0591299	0.0146665	0.439042	0.0591299	0.5787	0.762025	0.792258	0.578	0.426308
0.5796	0.0590351	0.0145651	0.436735	0.0590351	0.5797	0.761225	0.790968	0.579	0.424769
0.5806	0.0589443	0.0144648	0.434425	0.0589443	0.5807	0.760425	0.79	0.58	0.423231
0.5816	0.0588495	0.0143635	0.432117	0.0588495	0.5817	0.759625	0.78871	0.581	0.421692
0.5826	0.0587546	0.0142632	0.42981	0.0587546	0.5827	0.758825	0.787419	0.582	0.420154
0.5836	0.0586639	0.0141618	0.4275	0.0586639	0.5837	0.758025	0.786129	0.583	0.418769
0.5846	0.0585691	0.0140615	0.425193	0.0585691	0.5847	0.757225	0.785161	0.584	0.417231
0.5856	0.0584784	0.0139601	0.422883	0.0584784	0.5857	0.756425	0.783871	0.5851	0.415692
0.5866	0.0583835	0.0138598	0.420575	0.0583835	0.5867	0.755625	0.782581	0.5861	0.414154
0.5876	0.0582887	0.0137584	0.418268	0.0582887	0.5877	0.754825	0.78129	0.5871	0.412615
0.5886	0.0581979	0.0136582	0.415958	0.0581979	0.5887	0.754	0.780323	0.5881	0.411231
0.5896	0.0581031	0.0135568	0.413651	0.0581031	0.5897	0.7532	0.779032	0.5891	0.409692
0.5906	0.0580124	0.0134565	0.411341	0.0580124	0.5907	0.7524	0.777742	0.5901	0.408154
0.5916	0.0579175	0.0133551	0.409033	0.0579175	0.5917	0.7516	0.776452	0.5911	0.406615
0.5926	0.0578268	0.0132548	0.406723	0.0578268	0.5927	0.7508	0.775484	0.5921	0.405077
0.5936	0.057732	0.0131534	0.404416	0.057732	0.5938	0.75	0.774194	0.5931	0.403692
0.5946	0.0576371	0.0130521	0.402109	0.0576371	0.5938	0.75	0.774194	0.5941	0.402154
0.5956	0.0575464	0.0129518	0.399799	0.0575464	0.5948	0.750675	0.772581	0.5951	0.400615
0.5966	0.0574515	0.0128504	0.397491	0.0574515	0.5958	0.751325	0.770968	0.5961	0.399077
0.5976	0.0573608	0.0127501	0.395181	0.0573608	0.5968	0.752	0.769032	0.5971	0.397538
0.5986	0.057266	0.0126487	0.392874	0.057266	0.5978	0.752675	0.767419	0.5981	0.396154
0.5996	0.0571753	0.0125484	0.390564	0.0571753	0.5988	0.75335	0.765806	0.5991	0.394615
0.6006	0.0570804	0.012447	0.388257	0.0570804	0.5998	0.754	0.764194	0.6001	0.393077
0.6016	0.0569856	0.0123468	0.385949	0.0569856	0.6008	0.754675	0.762581	0.6011	0.391538
0.6026	0.0568948	0.0122454	0.383639	0.0568948	0.6018	0.75535	0.760645	0.6021	0.39
0.6036	0.0568	0.0121451	0.381332	0.0568	0.6028	0.756025	0.759032	0.6031	0.388615
0.6046	0.0567093	0.0120437	0.379022	0.0567093	0.6038	0.756675	0.757419	0.6041	0.387077
0.6056	0.0566144	0.0119434	0.376715	0.0566144	0.6048	0.75735	0.755806	0.6052	0.385538
0.6066	0.0565196	0.011842	0.374407	0.0565196	0.6058	0.758025	0.753871	0.6062	0.384
0.6076	0.0564289	0.0117418	0.372097	0.0564289	0.6068	0.7587	0.752258	0.6072	0.382462
0.6086	0.056334	0.0116404	0.36979	0.056334	0.6078	0.75935	0.750645	0.6082	0.381077
0.6096	0.0562433	0.0115401	0.36748	0.0562433	0.6088	0.760025	0.749032	0.6092	0.379538
0.6106	0.0561485	0.0114387	0.365173	0.0561485	0.6098	0.7607	0.747419	0.6102	0.378
0.6116	0.0560577	0.0113384	0.362862	0.0560577	0.6108	0.761375	0.745484	0.6112	0.376462
0.6126	0.0559629	0.011237	0.360555	0.0559629	0.6118	0.762025	0.743871	0.6122	0.374923
0.6136	0.055868	0.0111368	0.358248	0.055868	0.6128	0.7627	0.742258	0.6132	0.373538
0.6146	0.0557773	0.0110354	0.355938	0.0557773	0.6138	0.763375	0.740645	0.6142	0.372
0.6156	0.0556825	0.0109351	0.353631	0.0556825	0.6148	0.764025	0.739032	0.6152	0.370462
0.6166	0.0555918	0.0108337	0.35132	0.0555918	0.6158	0.7647	0.737097	0.6162	0.368923
0.6176	0.0554969	0.0107334	0.349013	0.0554969	0.6168	0.765375	0.735484	0.6172	0.367385
0.6186	0.0554021	0.010632	0.346706	0.0554021	0.6178	0.76605	0.733871	0.6182	0.366
0.6196	0.0553113	0.0105318	0.344396	0.0553113	0.6188	0.7667	0.732258	0.6192	0.364462
0.6206	0.0552165	0.0104304	0.342089	0.0552165	0.6198	0.767375	0.730323	0.6202	0.362923
0.6216	0.0551258	0.0103301	0.339778	0.0551258	0.6208	0.76805	0.72871	0.6212	0.361385
0.6226	0.0550309	0.0102287	0.337471	0.0550309	0.6218	0.768725	0.727097	0.6222	0.359846
0.6236	0.0549402	0.0101284	0.335161	0.0549402	0.6228	0.769375	0.725484	0.6232	0.358462
0.6246	0.0548454	0.010027	0.332854	0.0548454	0.6238	0.77005	0.723871	0.6242	0.356923
0.6256	0.0548455	0.010027	0.332854	0.0548454	0.6248	0.770725	0.721935	0.6253	0.355385
0.6266	0.0547711	0.010027	0.331666	0.0547711	0.6258	0.7714	0.720323	0.6263	0.353846
0.6276	0.054701	0.010027	0.330478	0.054701	0.6268	0.77205	0.71871	0.6273	0.352308
0.6286	0.0546268	0.010027	0.329289	0.0546268	0.6278	0.772725	0.717097	0.6283	0.350923
0.6296	0.0545526	0.010027	0.328101	0.0545526	0.6288	0.7734	0.715484	0.6293	0.349385
0.6306	0.0544784	0.010027	0.326913	0.0544784	0.6298	0.774075	0.713548	0.6303	0.347846
0.6316	0.0544082	0.010027	0.325728	0.0544082	0.6308	0.774725	0.711935	0.6313	0.346308
0.6326	0.054334	0.0100259	0.32454	0.054334	0.6319	0.7754	0.710323	0.6323	0.344769
0.6336	0.0542598	0.0100259	0.323352	0.0542598	0.6329	0.776075	0.70871	0.6333	0.343385
0.6346	0.0541856	0.0100259	0.322163	0.0541856	0.6339	0.77675	0.706774	0.6343	0.341846
0.6356	0.0541155	0.0100259	0.320975	0.0541155	0.6349	0.7774	0.705161	0.6353	0.340308
0.6366	0.0540412	0.0100259	0.319787	0.0540412	0.6359	0.778075	0.703548	0.6363	0.338769
0.6376	0.053967	0.0100259	0.318599	0.053967	0.6369	0.77875	0.701935	0.6373	0.337231
0.6386	0.0538928	0.0100259	0.317411	0.0538928	0.6379	0.7794	0.700323	0.6383	0.335846
0.6396	0.0538227	0.0100259	0.316223	0.0538227	0.6389	0.780075	0.698387	0.6393	0.334308
0.6406	0.0537485	0.0100259	0.315035	0.0537485	0.6399	0.78075	0.696774	0.6403	0.332769
0.6416	0.0536742	0.0100259	0.313849	0.0536742	0.6409	0.781425	0.695161	0.6413	0.331231
0.6426	0.0536	0.0100259	0.312661	0.0536	0.6419	0.782075	0.693548	0.6423	0.329692
0.6436	0.0535299	0.0100259	0.311473	0.0535299	0.6429	0.78275	0.691935	0.6433	0.328308
0.6446	0.0534557	0.0100248	0.310285	0.0534557	0.6439	0.783425	0.69	0.6443	0.326769
0.6456	0.0533814	0.0100248	0.309097	0.0533814	0.6449	0.7841	0.688387	0.6454	0.325231
0.6466	0.0533072	0.0100248	0.307909	0.0533072	0.6459	0.78475	0.686774	0.6464	0.323692
0.6476	0.0532371	0.0100248	0.30672	0.0532371	0.6469	0.785425	0.685161	0.6474	0.322154
0.6486	0.0531629	0.0100248	0.305532	0.0531629	0.6479	0.7861	0.683226	0.6484	0.320769
0.6496	0.0530887	0.0100248	0.304344	0.0530887	0.6489	0.786775	0.681613	0.6494	0.319231
0.6507	0.0530144	0.0100248	0.303156	0.0530144	0.6499	0.787425	0.68	0.6504	0.317692
0.6517	0.0529443	0.0100248	0.301971	0.0529443	0.6509	0.7881	0.678387	0.6514	0.316154
0.6527	0.0528701	0.0100248	0.300783	0.0528701	0.6519	0.788775	0.676774	0.6524	0.314615
0.6537	0.0527959	0.0100248	0.299594	0.0527959	0.6529	0.78945	0.674839	0.6534	0.313231
0.6547	0.0527216	0.0100248	0.298406	0.0527216	0.6539	0.7901	0.673226	0.6544	0.311692
0.6557	0.0526515	0.0100248	0.297218	0.0526515	0.6549	0.790775	0.671613	0.6554	0.310154
0.6567	0.0525773	0.0100248	0.29603	0.0525773	0.6559	0.79145	0.67	0.6564	0.308615
0.6577	0.0525031	0.0100237	0.294842	0.0525031	0.6569	0.7921	0.668387	0.6574	0.307077
0.6587	0.052433	0.0100237	0.293654	0.052433	0.6579	0.792775	0.666452	0.6584	0.305692
0.6597	0.0523588	0.0100237	0.292465	0.0523588	0.6589	0.79345	0.664839	0.6594	0.304154
0.6607	0.0522845	0.0100237	0.291277	0.0522845	0.6599	0.794125	0.663226	0.6604	0.302615
0.6617	0.0522103	0.0100237	0.290089	0.0522103	0.6609	0.794775	0.661613	0.6614	0.301077
0.6627	0.0521402	0.0100237	0.288904	0.0521402	0.6619	0.79545	0.659677	0.6624	0.299538
0.6637	0.052066	0.0100237	0.287716	0.052066	0.6629	0.796125	0.658065	0.6634	0.298154
0.6647	0.0519918	0.0100237	0.286528	0.0519918	0.6639	0.7968	0.656452	0.6644	0.296615
0.6657	0.0519175	0.0100237	0.285339	0.0519175	0.6649	0.79745	0.654839	0.6655	0.295077
0.6667	0.0518474	0.0100237	0.284151	0.0518474	0.6659	0.798125	0.653226	0.6665	0.293538
0.6677	0.0517732	0.0100237	0.282963	0.0517732	0.6669	0.7988	0.65129	0.6675	0.292
0.6687	0.051699	0.0100237	0.281775	0.051699	0.6679	0.799475	0.649677	0.6685	0.290615
0.6697	0.0516247	0.0100225	0.280587	0.0516247	0.669	0.800125	0.648065	0.6695	0.289077
0.6707	0.0515546	0.0100225	0.279399	0.0515546	0.67	0.8008	0.646452	0.6705	0.287538
0.6717	0.0514804	0.0100225	0.278211	0.0514804	0.671	0.801475	0.644839	0.6715	0.286
0.6727	0.0514062	0.0100225	0.277025	0.0514062	0.672	0.80215	0.642903	0.6725	0.284462
0.6737	0.051332	0.0100225	0.275837	0.051332	0.673	0.8028	0.64129	0.6735	0.283077
0.6747	0.0512619	0.0100225	0.274649	0.0512619	0.674	0.803475	0.639677	0.6745	0.281538
0.6757	0.0511876	0.0100225	0.273461	0.0511876	0.675	0.80415	0.638065	0.6755	0.28
0.6767	0.0511134	0.0100225	0.272273	0.0511134	0.676	0.804825	0.636129	0.6765	0.278462
0.6777	0.0510392	0.0100225	0.271085	0.0510392	0.677	0.805475	0.634516	0.6775	0.277077
0.6787	0.0509691	0.0100225	0.269896	0.0509691	0.678	0.80615	0.632903	0.6785	0.275538
0.6797	0.0508948	0.0100225	0.268708	0.0508948	0.679	0.806825	0.63129	0.6795	0.274
0.6807	0.0508206	0.0100225	0.26752	0.0508206	0.68	0.807475	0.629677	0.6805	0.272462
0.6817	0.0507464	0.0100214	0.266332	0.0507464	0.681	0.80815	0.627742	0.6815	0.270923
0.6827	0.0506763	0.0100214	0.265147	0.0506763	0.682	0.808825	0.626129	0.6825	0.269538
0.6837	0.0506021	0.0100214	0.263959	0.0506021	0.683	0.8095	0.624516	0.6835	0.268
0.6847	0.0505278	0.0100214	0.26277	0.0505278	0.684	0.81015	0.622903	0.6845	0.266462
0.6857	0.0504536	0.0100214	0.261582	0.0504536	0.685	0.810825	0.62129	0.6856	0.264923
0.6867	0.0503835	0.0100214	0.260394	0.0503835	0.686	0.8115	0.619355	0.6866	0.263385
0.6877	0.0503093	0.0100214	0.259206	0.0503093	0.687	0.812175	0.617742	0.6876	0.262
0.6887	0.0502351	0.0100214	0.258018	0.0502351	0.688	0.812825	0.616129	0.6886	0.260462
0.6897	0.0501649	0.0100214	0.25683	0.0501649	0.689	0.8135	0.614516	0.6896	0.258923
0.6907	0.0500907	0.0100214	0.255642	0.0500907	0.69	0.814175	0.612581	0.6906	0.257385
0.6917	0.0500165	0.0100214	0.254453	0.0500165	0.691	0.81485	0.610968	0.6916	0.255846
0.6927	0.0499423	0.0100214	0.253265	0.0499423	0.692	0.8155	0.609355	0.6926	0.254462
0.6937	0.0498722	0.0100214	0.25208	0.0498722	0.693	0.816175	0.607742	0.6936	0.252923
0.6947	0.0497979	0.0100203	0.250892	0.0497979	0.694	0.81685	0.606129	0.6946	0.251385
0.6957	0.0497237	0.0100203	0.249704	0.0497237	0.695	0.817525	0.604194	0.6956	0.249846
0.6967	0.0496495	0.0100203	0.248516	0.0496495	0.696	0.818175	0.602581	0.6966	0.248308
0.6977	0.0495794	0.0100203	0.247327	0.0495794	0.697	0.81885	0.600968	0.6976	0.246923
0.6987	0.0495052	0.0100203	0.246139	0.0495052	0.698	0.819525	0.599355	0.6986	0.245385
0.6997	0.0494309	0.0100203	0.244951	0.0494309	0.699	0.820175	0.597742	0.6996	0.243846
0.7007	0.0493567	0.0100203	0.243763	0.0493567	0.7	0.82085	0.595806	0.7006	0.242308
0.7017	0.0492866	0.0100203	0.242575	0.0492866	0.701	0.821525	0.594194	0.7016	0.240769
0.7027	0.0492124	0.0100203	0.241387	0.0492124	0.702	0.8222	0.592581	0.7026	0.239385
0.7037	0.0491381	0.0100203	0.240201	0.0491381	0.703	0.82285	0.590968	0.7036	0.237846
0.7047	0.0490639	0.0100203	0.239013	0.0490639	0.704	0.823525	0.589032	0.7046	0.236308
0.7057	0.0489938	0.0100203	0.237825	0.0489938	0.705	0.8242	0.587419	0.7057	0.234769
0.7067	0.0489196	0.0100192	0.236637	0.0489196	0.706	0.824875	0.585806	0.7067	0.233231
0.7077	0.0488454	0.0100192	0.235449	0.0488454	0.7071	0.825525	0.584194	0.7077	0.231846
0.7087	0.0487711	0.0100192	0.234261	0.0487711	0.7081	0.8262	0.582581	0.7087	0.230308
0.7097	0.048701	0.0100192	0.233072	0.048701	0.7091	0.826875	0.580645	0.7097	0.228769
0.7107	0.0486268	0.0100192	0.231884	0.0486268	0.7101	0.82755	0.579032	0.7107	0.227231
0.7117	0.0485526	0.0100192	0.230696	0.0485526	0.7111	0.8282	0.577419	0.7117	0.225692
0.7127	0.0484784	0.0100192	0.229508	0.0484784	0.7121	0.828875	0.575806	0.7127	0.224308
0.7137	0.0484082	0.0100192	0.228323	0.0484082	0.7131	0.82955	0.574194	0.7137	0.222769
0.7147	0.048334	0.0100192	0.227135	0.048334	0.7141	0.830225	0.572258	0.7147	0.221231
0.7157	0.0482598	0.0100192	0.225946	0.0482598	0.7151	0.830875	0.570645	0.7157	0.219692
0.7167	0.0481856	0.0100192	0.224758	0.0481856	0.7161	0.83155	0.569032	0.7167	0.218154
0.7177	0.0481155	0.0100192	0.22357	0.0481155	0.7171	0.832225	0.567419	0.7177	0.216769
0.7187	0.0480412	0.010018	0.222382	0.0480412	0.7181	0.8329	0.565484	0.7187	0.215231
0.7197	0.047967	0.010018	0.221194	0.047967	0.7191	0.83355	0.563871	0.7197	0.213692
0.7207	0.0478969	0.010018	0.220006	0.0478969	0.7201	0.834225	0.562258	0.7207	0.212154
0.7217	0.0478227	0.010018	0.218818	0.0478227	0.7211	0.8349	0.560645	0.7217	0.210615
0.7227	0.0477485	0.010018	0.217629	0.0477485	0.7221	0.83555	0.559032	0.7227	0.209231
0.7237	0.0476742	0.010018	0.216441	0.0476742	0.7231	0.836225	0.557097	0.7237	0.207692
0.7247	0.0476041	0.010018	0.215256	0.0476041	0.7241	0.8369	0.555484	0.7247	0.206154
0.7257	0.0475299	0.010018	0.214068	0.0475299	0.7251	0.837575	0.553871	0.7258	0.204615
0.7267	0.0474557	0.010018	0.21288	0.0474557	0.7261	0.838225	0.552258	0.7268	0.203077
0.7277	0.0473814	0.010018	0.211692	0.0473814	0.7271	0.8389	0.550645	0.7278	0.201692
0.7287	0.0473113	0.010018	0.210503	0.0473113	0.7281	0.839575	0.54871	0.7288	0.200154
0.7297	0.0472371	0.010018	0.209315	0.0472371	0.7291	0.84025	0.547097	0.7298	0.198615
0.7307	0.0471629	0.010018	0.208127	0.0471629	0.7301	0.8409	0.545484	0.7308	0.197077
0.7317	0.0470887	0.0100169	0.206939	0.0470887	0.7311	0.841575	0.543871	0.7318	0.195538
0.7327	0.0470186	0.0100169	0.205751	0.0470186	0.7321	0.84225	0.541935	0.7328	0.194154
0.7337	0.0469443	0.0100169	0.204563	0.0469443	0.7331	0.842925	0.540323	0.7338	0.192615
0.7347	0.0468701	0.0100169	0.203377	0.0468701	0.7341	0.843575	0.53871	0.7348	0.191077
0.7357	0.0467959	0.0100169	0.202189	0.0467959	0.7351	0.84425	0.537097	0.7358	0.189538
0.7367	0.0467258	0.0100169	0.201001	0.0467258	0.7361	0.844925	0.535484	0.7368	0.188
0.7377	0.0466515	0.0100169	0.199813	0.0466515	0.7371	0.8456	0.533548	0.7378	0.186615
0.7387	0.0465773	0.0100169	0.198625	0.0465773	0.7381	0.84625	0.531935	0.7388	0.185077
0.7397	0.0465031	0.0100169	0.197437	0.0465031	0.7391	0.846925	0.530323	0.7398	0.183538
0.7407	0.046433	0.0100169	0.196249	0.046433	0.7401	0.8476	0.52871	0.7408	0.182
0.7417	0.0463588	0.0100169	0.19506	0.0463588	0.7411	0.84825	0.527097	0.7418	0.180462
0.7427	0.0462845	0.0100169	0.193872	0.0462845	0.7421	0.848925	0.525161	0.7428	0.179077
0.7437	0.0462103	0.0100158	0.192684	0.0462103	0.7431	0.8496	0.523548	0.7438	0.177538
0.7447	0.0461402	0.0100158	0.191499	0.0461402	0.7442	0.850275	0.521935	0.7448	0.176
0.7457	0.046066	0.0100158	0.190311	0.046066	0.7452	0.850925	0.520323	0.7459	0.174462
0.7467	0.0459918	0.0100158	0.189123	0.0459918	0.7462	0.8516	0.518387	0.7469	0.172923
0.7477	0.0459175	0.0100158	0.187934	0.0459175	0.7472	0.852275	0.516774	0.7479	0.171538
0.7487	0.0458474	0.0100158	0.186746	0.0458474	0.7482	0.85295	0.515161	0.7489	0.17
0.7497	0.0457732	0.0100158	0.185558	0.0457732	0.7492	0.8536	0.513548	0.7499	0.168462
0.7508	0.0457732	0.0100158	0.185558	0.0457732	0.7502	0.854275	0.511935	0.7509	0.166923
0.7518	0.0457732	0.00999549	0.184436	0.0457732	0.7512	0.85495	0.51	0.7519	0.165385
0.7528	0.0457732	0.00997634	0.183311	0.0457732	0.7522	0.855625	0.508387	0.7529	0.164
0.7538	0.0457732	0.00995606	0.182189	0.0457732	0.7532	0.856275	0.506774	0.7539	0.162462
0.7548	0.0457732	0.00993578	0.181067	0.0457732	0.7542	0.85695	0.505161	0.7549	0.160923
0.7558	0.0457732	0.00991663	0.179942	0.0457732	0.7552	0.857625	0.503548	0.7559	0.159385
0.7568	0.0457732	0.00989635	0.17882	0.0457732	0.7562	0.8583	0.501613	0.7569	0.157846
0.7578	0.0457732	0.00987607	0.177699	0.0457732	0.7572	0.85895	0.5	0.7579	0.156462
0.7588	0.0457732	0.00985692	0.176574	0.0457732	0.7582	0.859625	0.498387	0.7589	0.154923
0.7598	0.0457732	0.00983664	0.175452	0.0457732	0.7592	0.8603	0.496774	0.7599	0.153385
0.7608	0.0457732	0.00981636	0.17433	0.0457732	0.7602	0.860975	0.494839	0.7609	0.151846
0.7618	0.0457732	0.00979721	0.173205	0.0457732	0.7612	0.861625	0.493226	0.7619	0.150308
0.7628	0.0457732	0.00977693	0.172083	0.0457732	0.7622	0.8623	0.491613	0.7629	0.148923
0.7638	0.0457732	0.00975665	0.170961	0.0457732	0.7632	0.862975	0.49	0.7639	0.147385
0.7648	0.0457732	0.00973749	0.169836	0.0457732	0.7642	0.863625	0.488387	0.7649	0.145846
0.7658	0.0457732	0.00971721	0.168714	0.0457732	0.7652	0.8643	0.486452	0.766	0.144308
0.7668	0.0457732	0.00969694	0.167592	0.0457732	0.7662	0.864975	0.484839	0.767	0.142769
0.7678	0.0457732	0.00967778	0.16647	0.0457732	0.7672	0.86565	0.483226	0.768	0.141385
0.7688	0.0457732	0.0096575	0.165345	0.0457732	0.7682	0.8663	0.481613	0.769	0.139846
0.7698	0.0457732	0.00963722	0.164223	0.0457732	0.7692	0.866975	0.48	0.77	0.138308
0.7708	0.0457732	0.00961807	0.163101	0.0457732	0.7702	0.86765	0.478065	0.771	0.136769
0.7718	0.0457732	0.00959779	0.161976	0.0457732	0.7712	0.868325	0.476452	0.772	0.135231
0.7728	0.0457732	0.00957751	0.160854	0.0457732	0.7722	0.868975	0.474839	0.773	0.133846
0.7738	0.0457732	0.00955836	0.159732	0.0457732	0.7732	0.86965	0.473226	0.774	0.132308
0.7748	0.0457732	0.00953808	0.158608	0.0457732	0.7742	0.870325	0.47129	0.775	0.130769
0.7758	0.0457732	0.0095178	0.157486	0.0457732	0.7752	0.871	0.469677	0.775	0.130769
0.7768	0.0457732	0.00949865	0.156364	0.0457732	0.7762	0.87165	0.468065	0.776	0.13
0.7778	0.0457732	0.00947837	0.155239	0.0457732	0.7772	0.872325	0.466452	0.777	0.129231
0.7788	0.0457732	0.00945809	0.154117	0.0457732	0.7782	0.873	0.464839	0.778	0.128462
0.7798	0.0457732	0.00943894	0.152995	0.0457732	0.7792	0.873675	0.462903	0.779	0.127692
0.7808	0.0457732	0.00941866	0.15187	0.0457732	0.7802	0.874325	0.46129	0.78	0.126923
0.7818	0.0457732	0.0093995	0.150748	0.0457732	0.7813	0.875	0.459677	0.781	0.126154
0.7828	0.0457732	0.00937922	0.149626	0.0457732	0.7823	0.875675	0.458065	0.782	0.125385
0.7838	0.0457732	0.00935895	0.148501	0.0457732	0.7833	0.876325	0.456452	0.7831	0.124615
0.7848	0.0457732	0.00933979	0.147379	0.0457732	0.7843	0.877	0.454516	0.7841	0.123846
0.7858	0.0457732	0.00931951	0.146257	0.0457732	0.7853	0.877675	0.452903	0.7851	0.123077
0.7868	0.0457732	0.00929923	0.145132	0.0457732	0.7863	0.87835	0.45129	0.7861	0.122308
0.7878	0.0457732	0.00928008	0.14401	0.0457732	0.7873	0.879	0.449677	0.7871	0.121538
0.7888	0.0457732	0.0092598	0.142888	0.0457732	0.7883	0.879675	0.448065	0.7881	0.120769
0.7898	0.0457732	0.00923952	0.141764	0.0457732	0.7893	0.88035	0.446129	0.7891	0.12
0.7908	0.0457732	0.00922037	0.140642	0.0457732	0.7903	0.881025	0.444516	0.7901	0.119077
0.7918	0.0457732	0.00920009	0.13952	0.0457732	0.7913	0.881675	0.442903	0.7911	0.118308
0.7928	0.0457732	0.00917981	0.138395	0.0457732	0.7923	0.88235	0.44129	0.7921	0.117538
0.7938	0.0457732	0.00916066	0.137273	0.0457732	0.7933	0.883025	0.439355	0.7931	0.116769
0.7948	0.0457732	0.00914038	0.136151	0.0457732	0.7943	0.8837	0.437742	0.7941	0.116
0.7958	0.0457732	0.0091201	0.135026	0.0457732	0.7953	0.88435	0.436129	0.7951	0.115231
0.7968	0.0457732	0.00910095	0.133904	0.0457732	0.7963	0.885025	0.434516	0.7961	0.114462
0.7978	0.0457732	0.00908067	0.132782	0.0457732	0.7973	0.8857	0.432903	0.7971	0.113692
0.7988	0.0457732	0.00906039	0.13166	0.0457732	0.7983	0.886375	0.430968	0.7982	0.112923
0.7998	0.0457732	0.00904123	0.130535	0.0457732	0.7993	0.887025	0.429355	0.7992	0.112154
0.8008	0.0457732	0.00902096	0.129413	0.0457732	0.8003	0.8877	0.427742	0.8002	0.111385
0.8018	0.0457732	0.00900068	0.128291	0.0457732	0.8013	0.888375	0.426129	0.8012	0.110615
0.8028	0.0457732	0.00898152	0.127166	0.0457732	0.8023	0.889025	0.424516	0.8022	0.109846
0.8038	0.0457732	0.00896124	0.126044	0.0457732	0.8033	0.8897	0.422581	0.8032	0.109077
0.8048	0.0457732	0.00894096	0.124922	0.0457732	0.8043	0.890375	0.420968	0.8042	0.108308
0.8058	0.0457732	0.00892181	0.123797	0.0457732	0.8053	0.89105	0.419355	0.8052	0.107538
0.8068	0.0457732	0.00890153	0.122675	0.0457732	0.8063	0.8917	0.417742	0.8062	0.106769
0.8078	0.0457732	0.00888125	0.121554	0.0457732	0.8073	0.892375	0.415806	0.8072	0.106
0.8088	0.0457732	0.0088621	0.120429	0.0457732	0.8083	0.89305	0.414194	0.8082	0.105231
0.8098	0.0457732	0.00884182	0.119307	0.0457732	0.8093	0.893725	0.412581	0.8092	0.104462
0.8108	0.0457732	0.00882154	0.118185	0.0457732	0.8103	0.894375	0.410968	0.8102	0.103692
0.8118	0.0457732	0.00880239	0.11706	0.0457732	0.8113	0.89505	0.409355	0.8112	0.102923
0.8128	0.0457732	0.00878211	0.115938	0.0457732	0.8123	0.895725	0.407419	0.8122	0.102154
0.8138	0.0457732	0.00876183	0.114816	0.0457732	0.8133	0.8964	0.405806	0.8133	0.101385
0.8148	0.0457732	0.00874268	0.113691	0.0457732	0.8143	0.89705	0.404194	0.8143	0.100615
0.8158	0.0457732	0.0087224	0.112569	0.0457732	0.8153	0.897725	0.402581	0.8153	0.0998462
0.8168	0.0457732	0.00870212	0.111447	0.0457732	0.8163	0.8984	0.400968	0.8163	0.0990769
0.8178	0.0457732	0.00868297	0.110322	0.0457732	0.8173	0.899075	0.399032	0.8173	0.0983077
0.8188	0.0457732	0.00866269	0.1092	0.0457732	0.8183	0.899725	0.397419	0.8183	0.0975385
0.8198	0.0457732	0.00864241	0.108078	0.0457732	0.8194	0.9004	0.395806	0.8193	0.0967692
0.8208	0.0457732	0.00862325	0.106953	0.0457732	0.8204	0.901075	0.394194	0.8203	0.0958462
0.8218	0.0457732	0.00860297	0.105831	0.0457732	0.8214	0.90175	0.392258	0.8213	0.0950769
0.8228	0.0457732	0.00858269	0.104709	0.0457732	0.8224	0.9024	0.390645	0.8223	0.0943077
0.8238	0.0457732	0.00856354	0.103585	0.0457732	0.8234	0.903075	0.389032	0.8233	0.0935385
0.8248	0.0457732	0.00854326	0.102463	0.0457732	0.8244	0.90375	0.387419	0.8243	0.0927692
0.8258	0.0457732	0.00852298	0.101341	0.0457732	0.8254	0.9044	0.385806	0.8253	0.092
0.8268	0.0457732	0.00850383	0.100216	0.0457732	0.8264	0.905075	0.383871	0.8263	0.0912308
0.8278	0.0457732	0.00848355	0.0990938	0.0457732	0.8274	0.90575	0.382258	0.8273	0.0904615
0.8288	0.0457732	0.00846327	0.0979718	0.0457732	0.8284	0.906425	0.380645	0.8284	0.0896923
0.8298	0.0457732	0.00844412	0.0968498	0.0457732	0.8294	0.907075	0.379032	0.8294	0.0889231
0.8308	0.0457732	0.00842384	0.095725	0.0457732	0.8304	0.90775	0.377419	0.8304	0.0881538
0.8318	0.0457732	0.00840356	0.094603	0.0457732	0.8314	0.908425	0.375484	0.8314	0.0873846
0.8328	0.0457732	0.00838441	0.093481	0.0457732	0.8324	0.9091	0.373871	0.8324	0.0866154
0.8338	0.0457732	0.00836413	0.0923562	0.0457732	0.8334	0.90975	0.372258	0.8334	0.0858462
0.8348	0.0457732	0.00834385	0.0912342	0.0457732	0.8344	0.910425	0.370645	0.8344	0.0850769
0.8358	0.0457732	0.0083247	0.0901122	0.0457732	0.8354	0.9111	0.36871	0.8354	0.0843077
0.8368	0.0457732	0.00830442	0.0889873	0.0457732	0.8364	0.911775	0.367097	0.8364	0.0835385
0.8378	0.0457732	0.00828414	0.0878654	0.0457732	0.8374	0.912425	0.365484	0.8374	0.0827692
0.8388	0.0457732	0.00826498	0.0867434	0.0457732	0.8384	0.9131	0.363871	0.8384	0.082
0.8398	0.0457732	0.0082447	0.0856185	0.0457732	0.8394	0.913775	0.362258	0.8394	0.0812308
0.8408	0.0457732	0.00822443	0.0844965	0.0457732	0.8404	0.91445	0.360323	0.8404	0.0804615
0.8418	0.0457732	0.00820527	0.0833746	0.0457732	0.8414	0.9151	0.35871	0.8414	0.0796923
0.8428	0.0457732	0.00818499	0.0822497	0.0457732	0.8424	0.915775	0.357097	0.8424	0.0789231
0.8438	0.0457732	0.00816584	0.0811277	0.0457732	0.8434	0.91645	0.355484	0.8435	0.0781538
0.8448	0.0457732	0.00814556	0.0800058	0.0457732	0.8444	0.9171	0.353871	0.8445	0.0773846
0.8458	0.0457732	0.00812528	0.0788809	0.0457732	0.8454	0.917775	0.351935	0.8455	0.0766154
0.8468	0.0457732	0.00810613	0.0777589	0.0457732	0.8464	0.91845	0.350323	0.8465	0.0758462
0.8478	0.0457732	0.00808585	0.0766369	0.0457732	0.8474	0.919125	0.34871	0.8475	0.0750769
0.8488	0.0457732	0.00806557	0.0755121	0.0457732	0.8484	0.919775	0.347097	0.8485	0.0743077
0.8498	0.0457732	0.00804642	0.0743901	0.0457732	0.8494	0.92045	0.345161	0.8495	0.0735385
0.8509	0.0457732	0.00802614	0.0732681	0.0457732	0.8504	0.921125	0.343548	0.8505	0.0726154
0.8519	0.0457732	0.00800586	0.0721433	0.0457732	0.8514	0.9218	0.341935	0.8515	0.0718462
0.8529	0.0457732	0.00798671	0.0710213	0.0457732	0.8524	0.92245	0.340323	0.8525	0.0710769
0.8539	0.0457732	0.00796643	0.0698993	0.0457732	0.8534	0.923125	0.33871	0.8535	0.0703077
0.8549	0.0457732	0.00794615	0.0687745	0.0457732	0.8544	0.9238	0.336774	0.8545	0.0695385
0.8559	0.0457732	0.00792699	0.0676525	0.0457732	0.8554	0.924475	0.335161	0.8555	0.0687692
0.8569	0.0457732	0.00790671	0.0665305	0.0457732	0.8565	0.925125	0.333548	0.8565	0.068
0.8579	0.0457732	0.00788644	0.0654056	0.0457732	0.8575	0.9258	0.331935	0.8576	0.0672308
0.8589	0.0457732	0.00786728	0.0642837	0.0457732	0.8585	0.926475	0.330323	0.8586	0.0664615
0.8599	0.0457732	0.007847	0.0631617	0.0457732	0.8595	0.92715	0.328387	0.8596	0.0656923
0.8609	0.0457732	0.00782672	0.0620397	0.0457732	0.8605	0.9278	0.326774	0.8606	0.0649231
0.8619	0.0457732	0.00780757	0.0609148	0.0457732	0.8615	0.928475	0.325161	0.8616	0.0641538
0.8629	0.0457732	0.00778729	0.0597929	0.0457732	0.8625	0.92915	0.323548	0.8626	0.0633846
0.8639	0.0457732	0.00776701	0.0586709	0.0457732	0.8635	0.929825	0.321613	0.8636	0.0626154
0.8649	0.0457732	0.00774786	0.057546	0.0457732	0.8645	0.930475	0.32	0.8646	0.0618462
0.8659	0.0457732	0.00772758	0.0564241	0.0457732	0.8655	0.93115	0.318387	0.8656	0.0610769
0.8669	0.0457732	0.0077073	0.0553021	0.0457732	0.8665	0.931825	0.316774	0.8666	0.0603077
0.8679	0.0457732	0.00768815	0.0541772	0.0457732	0.8675	0.932475	0.315161	0.8676	0.0595385
0.8689	0.0457732	0.00766787	0.0530552	0.0457732	0.8685	0.93315	0.313226	0.8686	0.0587692
0.8699	0.0457732	0.00764759	0.0519333	0.0457732	0.8695	0.933825	0.311613	0.8696	0.058
0.8709	0.0457732	0.00762844	0.0508084	0.0457732	0.8705	0.9345	0.31	0.8706	0.0572308
0.8719	0.0457732	0.00760816	0.0496864	0.0457732	0.8715	0.93515	0.308387	0.8716	0.0564615
0.8729	0.0457732	0.00758788	0.0485644	0.0457732	0.8725	0.935825	0.306774	0.8727	0.0556923
0.8739	0.0457732	0.00756872	0.0474396	0.0457732	0.8735	0.9365	0.304839	0.8737	0.0549231
0.8749	0.0457732	0.00754845	0.0463176	0.0457732	0.8745	0.937175	0.303226	0.8747	0.0541538
0.8759	0.0457732	0.00754845	0.0463176	0.0457732	0.8755	0.937825	0.301613	0.8757	0.0533846
0.8769	0.0456784	0.00756872	0.0462514	0.0456784	0.8765	0.9385	0.3	0.8767	0.0526154
0.8779	0.0455876	0.00758788	0.0461881	0.0455876	0.8775	0.939175	0.298065	0.8777	0.0518462
0.8789	0.0454928	0.00760816	0.046122	0.0454928	0.8785	0.93985	0.296452	0.8787	0.0510769
0.8799	0.0454021	0.00762844	0.0460587	0.0454021	0.8795	0.9405	0.294839	0.8797	0.0503077
0.8809	0.0453072	0.00764872	0.0459925	0.0453072	0.8805	0.941175	0.293226	0.8807	0.0493846
0.8819	0.0452165	0.00766787	0.0459292	0.0452165	0.8815	0.94185	0.291613	0.8817	0.0486154
0.8829	0.0451216	0.00768815	0.0458631	0.0451216	0.8825	0.942525	0.289677	0.8827	0.0478462
0.8839	0.0450268	0.00770843	0.0457969	0.0450268	0.8835	0.943175	0.288065	0.8837	0.0470769
0.8849	0.0449361	0.00772871	0.0457336	0.0449361	0.8845	0.94385	0.286452	0.8847	0.0463077
0.8859	0.0448412	0.00774786	0.0456674	0.0448412	0.8855	0.944525	0.284839	0.8857	0.0455385
0.8869	0.0447505	0.00776814	0.0456041	0.0447505	0.8865	0.945175	0.283226	0.8867	0.0447692
0.8879	0.0446557	0.00778842	0.045538	0.0446557	0.8875	0.94585	0.28129	0.8878	0.044
0.8889	0.0445608	0.0078087	0.0454718	0.0445608	0.8885	0.946525	0.279677	0.8888	0.0432308
0.8899	0.0444701	0.00782785	0.0454085	0.0444701	0.8895	0.9472	0.278065	0.8898	0.0424615
0.8909	0.0443753	0.00784813	0.0453423	0.0443753	0.8905	0.94785	0.276452	0.8908	0.0416923
0.8919	0.0442845	0.00786841	0.0452791	0.0442845	0.8915	0.948525	0.274516	0.8918	0.0409231
0.8929	0.0441897	0.00788869	0.0452129	0.0441897	0.8925	0.9492	0.272903	0.8928	0.0401538
0.8939	0.044099	0.00790784	0.0451496	0.044099	0.8935	0.949875	0.27129	0.8938	0.0393846
0.8949	0.0440041	0.00792812	0.0450834	0.0440041	0.8946	0.950525	0.269677	0.8948	0.0386154
0.8959	0.0439093	0.0079484	0.0450173	0.0439093	0.8956	0.9512	0.268065	0.8958	0.0378462
0.8969	0.0438186	0.00796868	0.044954	0.0438186	0.8966	0.951875	0.266129	0.8968	0.0370769
0.8979	0.0437237	0.00798783	0.0448878	0.0437237	0.8976	0.95255	0.264516	0.8978	0.0363077
0.8989	0.043633	0.00800811	0.0448245	0.043633	0.8986	0.9532	0.262903	0.8988	0.0355385
0.8999	0.0435381	0.00802839	0.0447583	0.0435381	0.8996	0.953875	0.26129	0.8998	0.0347692
0.9009	0.0434433	0.00804867	0.0446922	0.0434433	0.9006	0.95455	0.259677	0.9008	0.034
0.9019	0.0433526	0.00806782	0.0446289	0.0433526	0.9016	0.955225	0.257742	0.9018	0.0332308
0.9029	0.0432577	0.0080881	0.0445627	0.0432577	0.9026	0.955875	0.256129	0.9029	0.0324615
0.9039	0.043167	0.00810838	0.0444994	0.043167	0.9036	0.95655	0.254516	0.9039	0.0316923
0.9049	0.0430722	0.00812866	0.0444333	0.0430722	0.9046	0.957225	0.252903	0.9049	0.0309231
0.9059	0.0429814	0.00814781	0.04437	0.0429814	0.9056	0.9579	0.250968	0.9059	0.0301538
0.9069	0.0428866	0.00816809	0.0443038	0.0428866	0.9066	0.95855	0.249355	0.9069	0.0293846
0.9079	0.0427918	0.00818837	0.0442376	0.0427918	0.9076	0.959225	0.247742	0.9079	0.0286154
0.9089	0.042701	0.00820753	0.0441743	0.042701	0.9086	0.9599	0.246129	0.9089	0.0278462
0.9099	0.0426062	0.00822781	0.0441082	0.0426062	0.9096	0.96055	0.244516	0.9099	0.0270769
0.9109	0.0425155	0.00824808	0.0440449	0.0425155	0.9106	0.961225	0.242581	0.9109	0.0261538
0.9119	0.0424206	0.00826836	0.0439787	0.0424206	0.9116	0.9619	0.240968	0.9119	0.0253846
0.9129	0.0423299	0.00828752	0.0439154	0.0423299	0.9126	0.962575	0.239355	0.9129	0.0246154
0.9139	0.0422351	0.0083078	0.0438493	0.0422351	0.9136	0.963225	0.237742	0.9139	0.0238462
0.9149	0.0421402	0.00832808	0.0437831	0.0421402	0.9146	0.9639	0.236129	0.9149	0.0230769
0.9159	0.0420495	0.00834836	0.0437198	0.0420495	0.9156	0.964575	0.234194	0.9159	0.0223077
0.9169	0.0419546	0.00836751	0.0436536	0.0419546	0.9166	0.96525	0.232581	0.9169	0.0215385
0.9179	0.0418639	0.00838779	0.0435903	0.0418639	0.9176	0.9659	0.230968	0.918	0.0207692
0.9189	0.0417691	0.00840807	0.0435242	0.0417691	0.9186	0.966575	0.229355	0.919	0.02
0.9199	0.0416742	0.00842835	0.043458	0.0416742	0.9196	0.96725	0.227419	0.92	0.0192308
0.9209	0.0415835	0.0084475	0.0433947	0.0415835	0.9206	0.967925	0.225806	0.921	0.0184615
0.9219	0.0414887	0.00846778	0.0433285	0.0414887	0.9216	0.968575	0.224194	0.922	0.0176923
0.9229	0.0413979	0.00848806	0.0432652	0.0413979	0.9226	0.96925	0.222581	0.923	0.0169231
0.9239	0.0413031	0.00850834	0.0431991	0.0413031	0.9236	0.969925	0.220968	0.924	0.0161538
0.9249	0.0412124	0.00852749	0.0431358	0.0412124	0.9246	0.9706	0.219032	0.925	0.0153846
0.9259	0.0411175	0.00854777	0.0430696	0.0411175	0.9256	0.97125	0.217419	0.925	0.0153846
0.9269	0.0410227	0.00856805	0.0430035	0.0410227	0.9266	0.971925	0.215806	0.926	0.0153846
0.9279	0.040932	0.00858833	0.0429402	0.040932	0.9276	0.9726	0.214194	0.927	0.0153846
0.9289	0.0408371	0.00860748	0.042874	0.0408371	0.9286	0.97325	0.212581	0.928	0.0153846
0.9299	0.0407464	0.00862776	0.0428107	0.0407464	0.9296	0.973925	0.210645	0.9291	0.0153846
0.9309	0.0406515	0.00864804	0.0427445	0.0406515	0.9306	0.9746	0.209032	0.9301	0.0153846
0.9319	0.0405567	0.00866832	0.0426784	0.0405567	0.9317	0.975275	0.207419	0.9311	0.0153846
0.9329	0.040466	0.00868747	0.0426151	0.040466	0.9327	0.975925	0.205806	0.9321	0.0153846
0.9339	0.0403711	0.00870775	0.0425489	0.0403711	0.9337	0.9766	0.203871	0.9331	0.0153846
0.9349	0.0402804	0.00872803	0.0424856	0.0402804	0.9347	0.977275	0.202258	0.9341	0.0153846
0.9359	0.0401856	0.00874831	0.0424194	0.0401856	0.9357	0.97795	0.200645	0.9351	0.0153846
0.9369	0.0400948	0.00876746	0.0423562	0.0400948	0.9367	0.9786	0.199032	0.9361	0.0153846
0.9379	0.04	0.00878774	0.04229	0.04	0.9377	0.979275	0.197419	0.9372	0.0153846
0.9389	0.0399052	0.00880802	0.0422238	0.0399052	0.9387	0.97995	0.195484	0.9382	0.0153846
0.9399	0.0398144	0.00882717	0.0421605	0.0398144	0.9397	0.980625	0.193871	0.9392	0.0153846
0.9409	0.0397196	0.00884745	0.0420944	0.0397196	0.9407	0.981275	0.192258	0.9402	0.0153846
0.9419	0.0396289	0.00886773	0.0420311	0.0396289	0.9417	0.98195	0.190645	0.9412	0.0153846
0.9429	0.039534	0.00888801	0.0419649	0.039534	0.9427	0.982625	0.189032	0.9422	0.0153846
0.9439	0.0394433	0.00890717	0.0419016	0.0394433	0.9437	0.9833	0.187097	0.9432	0.0153846
0.9449	0.0393485	0.00892744	0.0418354	0.0393485	0.9447	0.98395	0.185484	0.9443	0.0153846
0.9459	0.0392536	0.00894772	0.0417693	0.0392536	0.9457	0.984625	0.183871	0.9453	0.0153846
0.9469	0.0391629	0.008968	0.041706	0.0391629	0.9467	0.9853	0.182258	0.9463	0.0153846
0.9479	0.039068	0.00898716	0.0416398	0.039068	0.9477	0.985975	0.180323	0.9473	0.0153846
0.9489	0.0389773	0.00900744	0.0415765	0.0389773	0.9487	0.986625	0.17871	0.9483	0.0153846
0.9499	0.0388825	0.00902772	0.0415104	0.0388825	0.9497	0.9873	0.177097	0.9493	0.0153846
0.951	0.0387876	0.00904799	0.0414442	0.0387876	0.9507	0.987975	0.175484	0.9503	0.0153846
0.952	0.0386969	0.00906715	0.0413809	0.0386969	0.9517	0.988625	0.173871	0.9514	0.0153846
0.953	0.0386021	0.00908743	0.0413147	0.0386021	0.9527	0.9893	0.171935	0.9524	0.0153846
0.954	0.0385113	0.00910771	0.0412514	0.0385113	0.9537	0.989975	0.170323	0.9534	0.0153846
0.955	0.0384165	0.00912799	0.0411853	0.0384165	0.9547	0.99065	0.16871	0.9544	0.0153846
0.956	0.0383258	0.00914714	0.041122	0.0383258	0.9557	0.9913	0.167097	0.9554	0.0153846
0.957	0.0382309	0.00916742	0.0410558	0.0382309	0.9567	0.991975	0.165484	0.9564	0.0153846
0.958	0.0381361	0.0091877	0.0409896	0.0381361	0.9577	0.99265	0.163548	0.9574	0.0153846
0.959	0.0380454	0.00920798	0.0409264	0.0380454	0.9587	0.993325	0.161935	0.9584	0.0153846
0.96	0.0379505	0.00922713	0.0408602	0.0379505	0.9597	0.993975	0.160323	0.9595	0.0153846
0.961	0.0378598	0.00924741	0.0407969	0.0378598	0.9607	0.99465	0.15871	0.9605	0.0153846
0.962	0.0377649	0.00926769	0.0407307	0.0377649	0.9617	0.995325	0.156774	0.9615	0.0153846
0.963	0.0376701	0.00928797	0.0406646	0.0376701	0.9627	0.996	0.155161	0.9625	0.0153846
0.964	0.0375794	0.00930712	0.0406013	0.0375794	0.9637	0.99665	0.153548	0.9635	0.0153846
0.965	0.0374845	0.0093274	0.0405351	0.0374845	0.9647	0.997325	0.151935	0.9645	0.0153846
0.966	0.0373938	0.00934768	0.0404718	0.0373938	0.9657	0.998	0.150323	0.9655	0.0153846
0.967	0.037299	0.00936796	0.0404056	0.037299	0.9667	0.998675	0.148387	0.9666	0.0153846
0.968	0.0372082	0.00938711	0.0403423	0.0372082	0.9677	0.999325	0.146774	0.9676	0.0153846
0.969	0.0371134	0.00940739	0.0402762	0.0371134	0.9688	1	0.145161	0.9686	0.0153846
0.97	0.0370186	0.00942767	0.04021	0.0370186	0.9688	1	0.145161	0.9696	0.0153846
0.971	0.0369278	0.00944682	0.0401467	0.0369278	0.9698	1	0.145161	0.9706	0.0153846
0.972	0.036833	0.0094671	0.0400806	0.036833	0.9708	1	0.145161	0.9716	0.0153846
0.973	0.0367423	0.00948738	0.0400173	0.0367423	0.9719	1	0.145161	0.9726	0.0153846
0.974	0.0366474	0.00950766	0.0399511	0.0366474	0.9729	1	0.145161	0.9736	0.0153846
0.975	0.0365567	0.00952681	0.0398878	0.0365567	0.974	1	0.145161	0.9747	0.0153846
0.976	0.0364619	0.00954709	0.0398216	0.0364619	0.975	1	0.145161	0.9757	0.0153846
0.977	0.036367	0.00956737	0.0397555	0.036367	0.976	1	0.145161	0.9767	0.0153846
0.978	0.0362763	0.00958765	0.0396922	0.0362763	0.9771	1	0.145161	0.9777	0.0153846
0.979	0.0361814	0.0096068	0.039626	0.0361814	0.9781	1	0.145161	0.9787	0.0153846
0.98	0.0360907	0.00962708	0.0395627	0.0360907	0.9792	1	0.145161	0.9797	0.0153846
0.981	0.0359959	0.00964736	0.0394965	0.0359959	0.9802	1	0.145161	0.9807	0.0153846
0.982	0.035901	0.00966764	0.0394304	0.035901	0.9812	1	0.145161	0.9818	0.0153846
0.983	0.0358103	0.0096868	0.0393671	0.0358103	0.9823	1	0.145161	0.9828	0.0153846
0.984	0.0357155	0.00970708	0.0393009	0.0357155	0.9833	1	0.145161	0.9838	0.0153846
0.985	0.0356247	0.00972735	0.0392376	0.0356247	0.9844	1	0.145161	0.9848	0.0153846
0.986	0.0355299	0.00974763	0.0391715	0.0355299	0.9854	1	0.145161	0.9858	0.0153846
0.987	0.0354392	0.00976679	0.0391082	0.0354392	0.9865	1	0.145161	0.9868	0.0153846
0.988	0.0353443	0.00978707	0.039042	0.0353443	0.9875	1	0.145161	0.9878	0.0153846
0.989	0.0352495	0.00980735	0.0389758	0.0352495	0.9885	1	0.145161	0.9889	0.0153846
0.99	0.0351588	0.00982763	0.0389125	0.0351588	0.9896	1	0.145161	0.9899	0.0153846
0.991	0.0350639	0.00984678	0.0388464	0.0350639	0.9906	1	0.145161	0.9909	0.0153846
0.992	0.0349732	0.00986706	0.0387831	0.0349732	0.9917	1	0.145161	0.9919	0.0153846
0.993	0.0348784	0.00988734	0.0387169	0.0348784	0.9927	1	0.145161	0.9929	0.0153846
0.994	0.0347835	0.00990762	0.0386507	0.0347835	0.9938	1	0.145161	0.9939	0.0153846
0.995	0.0346928	0.00992677	0.0385875	0.0346928	0.9948	1	0.145161	0.9949	0.0153846
0.996	0.0345979	0.00994705	0.0385213	0.0345979	0.9958	1	0.145161	0.9959	0.0153846
0.997	0.0345072	0.00996733	0.038458	0.0345072	0.9969	1	0.145161	0.997	0.0153846
0.998	0.0344124	0.00998761	0.0383918	0.0344124	0.9979	1	0.145161	0.998	0.0153846
0.999	0.0343216	0.0100068	0.0383285	0.0343216	0.999	1	0.145161	0.999	0.0153846
1	0.0342268	0.010027	0.0382624	0.0342268	1	1	0.145161	1	0.0153846
